# Supplementary material
Source: PubMed Central journal article supplement (PMC4707113)
Supplement: NIHMS736510-supplement-1.pdf [file NIHMS736510-supplement-1.pdf]

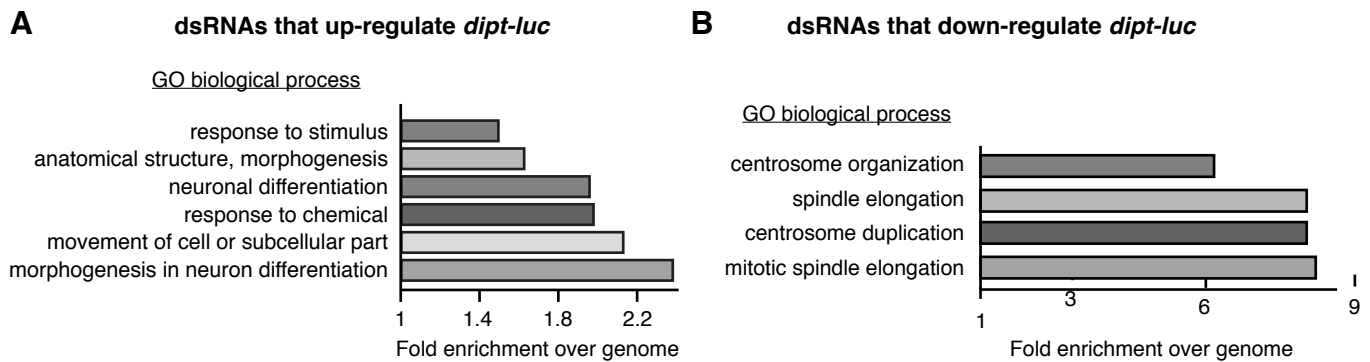

**Supplemental Figure 1A and B. Negative and positive regulators of *dipt* expression in hypercapnia identified by genome-wide screening are differentially enriched in specific gene functions compared to the whole genome.**

Graphs showing the fold enrichment of overrepresented Gene Ontology (GO) terms for the dsRNAs in the primary screen that scored as (A) negative regulators (Z-scores  $\geq +1.5$ ) or (B) positive regulators (Z-scores  $\leq -1.5$ ) of *dipt* expression. Statistical overrepresentation test performed using the Gene Ontology PANTHER Classification System Gene List analysis tool with Bonferroni correction for multiple testing and the GO biological process complete annotation dataset.

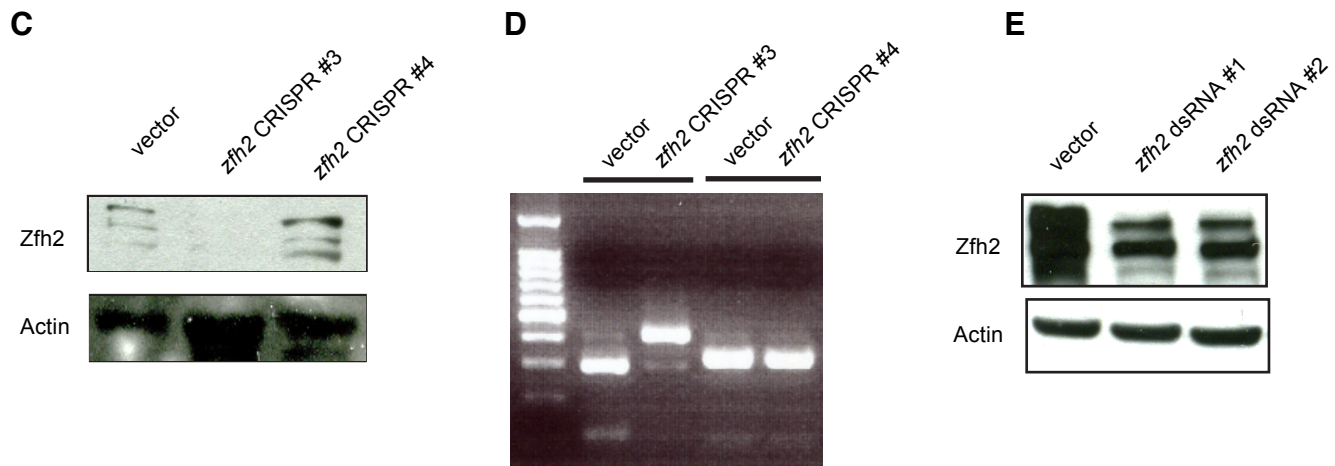

**Supplemental Figure 1C, 1D and 1E. Demonstration of the specificity of anti-Zfh2 anti-serum.**

C) Extracts from cells in which the *zfh2* locus had been mutated by CRISPR targeting (*zfh2* CRISPR #3, see panel D) show reduced staining of all high molecular weight bands that react with anti-Zfh2 anti-serum, whereas cells transfected with an ineffective guide RNA (*zfh2* CRISPR #4) have bands similar to control cells.

D) Restriction digests of PCR fragments spanning CRISPR target sites. The Bpu10I restriction enzyme site in the endogenous *zfh2* locus is disrupted in most cells transfected with a plasmid encoding guide RNA #3, but transfection with a plasmid encoding guide RNA #4, which did not affect immuno-reactive bands in panel A, failed to disrupt the endogenous MefI restriction site.

E) Treatment of S2\* cells with either of two distinct dsRNAs that target the *zfh2* mRNA also reduces the intensity of all high molecular weight bands.

Methods: Zfh2 anti-serum, Western blotting and RNAi protocols are described in the main text materials and methods. CRISPR targeting was performed using the stable transfection method of Bassett *et al.*<sup>1</sup> using the pAc-sgRNA-Cas9 vector. Sequences for guide and dsRNAs, and PCR target region primers as follows: Guide #3, 5'-TTCGATTCGGATGTTCCATGCTC-3', 5'-AACGAGCATGGAACATCCGAATC-3'; Guide #3 genomic target region primers, 5'-TTCGATTCGGATGTTCCATGCTC-3', 5'-AACGAGCATGGAACATCCGAATC-3'; Guide #4, 5'-CGATCCTCAGCTGTGAAATG-3', 5'-ATGTGCCCCACTTTAAGGGT-3'; Guide #4 genomic region primers, 5'-TTCGTAAATGTCCCAATGCAAT-3', 5'-AACATTGCATTGGGGACATTTAC-3'; dsRNA #1 DRSC amplicon DRSC17178; dsRNA #2, DRSC amplicon DRSC28010.

1. Bassett A.R., C. Tibbit, C.P. Ponting, J.L. Liu. 2014. Mutagenesis and homologous recombination in Drosophila cell lines using CRISPR/Cas9. *Biol Open*. 3:42-49.

**Table SI** Results of a pilot dsRNA screen targeting candidate CO<sub>2</sub> mediator genes

| Gene                             | Function                                                        | CO <sub>2</sub> /air | <i>dip-t-luc</i> <sup>1</sup><br>(normalized) |                 | Amplicon  |
|----------------------------------|-----------------------------------------------------------------|----------------------|-----------------------------------------------|-----------------|-----------|
|                                  |                                                                 |                      | air                                           | CO <sub>2</sub> |           |
| <i>iap2</i>                      | Inhibitor of apoptosis                                          | 0.17                 | 2.23                                          | 0.38            | DRSC07444 |
| <i>u-shaped</i>                  | Imd regulation at level of Relish (Friend of GATA homolog)      | 0.28                 | 5.49                                          | 1.56            | DRSC00843 |
| <i>basket</i>                    | Imd negative regulation, Jnk pathway kinase                     | 0.29                 | 1.75                                          | 0.50            | DRSC03499 |
| <i>caspar</i>                    | Imd negative regulation                                         | 0.30                 | 3.58                                          | 1.06            | DRSC07164 |
| <i>smb</i>                       | Imd negative regulation, SCF Ub ligase                          | 0.37                 | 0.77                                          | 0.28            | DRSC17056 |
| <i>nos</i>                       | Nitric oxide synthase                                           | 0.39                 | 1.63                                          | 0.63            | DRSC03381 |
| <i>akt1</i>                      | Metabolic regulator                                             | 0.45                 | 1.14                                          | 0.51            | DRSC14108 |
| <i>dnr1</i>                      | Imd negative regulation                                         | 0.45                 | 1.41                                          | 0.64            | DRSC03948 |
| <i>sima</i>                      | HIF-1 alpha; Hypoxia pathway                                    | 0.45                 | 0.60                                          | 0.27            | DRSC17055 |
| <i>pannier</i>                   | GATA transcription factor                                       | 0.57                 | 1.64                                          | 0.94            | DRSC17027 |
| <i>crebA</i>                     | Downstream of adenylyl cyclases                                 | 0.61                 | 1.55                                          | 0.95            | DRSC11122 |
| <i>CAH1</i> Carbonic anhydrase 1 | Putative CO <sub>2</sub> sensor                                 | 0.62                 | 1.45                                          | 0.90            | DRSC02009 |
| <i>imd</i>                       | Imd pathway                                                     | 0.62                 | 0.52                                          | 0.32            | DRSC05928 |
| <i>tak1</i>                      | Imd regulation at level of Relish, downstream of nuclear import | 0.62                 | 1.29                                          | 0.80            | DRSC20390 |
| <i>stim</i>                      | Calcium channel                                                 | 0.63                 | 1.28                                          | 0.80            | DRSC20158 |
| <i>skpA</i>                      | Imd negative regulation, SCF Ub ligase                          | 0.64                 | 0.60                                          | 0.38            | DRSC18833 |
| <i>ac13E</i>                     | Adenylate cyclase, Imd signaling regulator                      | 0.72                 | 0.77                                          | 0.56            | DRSC19325 |
| <i>rolled (ERK)</i>              | Possible hypercapnia mediator <sup>2</sup>                      | 0.72                 | 1.67                                          | 1.20            | DRSC07833 |
| <i>relish</i>                    | Imd pathway                                                     | 0.74                 | 0.49                                          | 0.37            | DRSC16819 |
| <i>slo</i>                       | Calcium-activated potassium channel, Imd regulation             | 0.89                 | 0.87                                          | 0.78            | DRSC17057 |
| <i>Gr21a</i>                     | Neuronal CO <sub>2</sub> sensor                                 | 0.95                 | 1.00                                          | 0.95            | DRSC00366 |
| no dsRNA control                 | Control 1                                                       | 1.00                 | 1.00                                          | 1.00            |           |
| <i>hsf</i>                       | Stress responses                                                | 1.03                 | 0.90                                          | 0.93            | DRSC07443 |
| <i>SNF1A (AMPK)</i>              | Possible hypercapnia mediator <sup>3</sup>                      | 1.08                 | 0.78                                          | 0.84            | DRSC18714 |
| <i>trp</i>                       | Calcium channel, Imd regulation                                 | 1.14                 | 1.76                                          | 2.01            | DRSC17088 |
| <i>TOR</i>                       | Metabolic regulator                                             | 1.15                 | 1.25                                          | 1.45            | DRSC02811 |
| <i>aPKC</i>                      | Possible hypercapnia mediator <sup>3</sup>                      | 1.28                 | 0.76                                          | 0.97            | DRSC07639 |
| <i>CaMKKII</i>                   | Possible hypercapnia mediator <sup>3</sup>                      | 1.32                 | 0.82                                          | 1.08            | DRSC17214 |
| <i>Gr63a</i>                     | Neuronal CO <sub>2</sub> sensor                                 | 1.32                 | 0.65                                          | 0.86            | DRSC08438 |
| <i>ira</i>                       | Imd negative regulation, Jnk pathway TF                         | 1.32                 | 0.61                                          | 0.80            | DRSC07447 |
| <i>tango</i>                     | HIF-1 beta; Hypoxia pathway                                     | 1.35                 | 0.74                                          | 1.00            | DRSC17077 |
| <i>pka-C1</i>                    | Possible hypercapnia mediator <sup>4</sup>                      | 1.41                 | 0.79                                          | 1.11            | DRSC03399 |
| <i>CAH2</i> Carbonic anhydrase 2 | Putative CO <sub>2</sub> sensor                                 | 1.61                 | 1.10                                          | 1.78            | DRSC10746 |
| <i>STAT92E</i>                   | JAK/STAT pathway TF                                             | 1.85                 | 1.11                                          | 2.05            | DRSC16870 |
| <i>olf186-F (orai)</i>           | Calcium channel                                                 | 1.96                 | 1.13                                          | 2.22            | DRSC22061 |
| no dsRNA control                 | Control 2                                                       | 2.01                 | 0.78                                          | 1.56            |           |

<sup>1</sup>Values for air and 13% CO<sub>2</sub> are normalized *dip-luc* reporter levels for cells treated with dsRNA compared to control cells for the listed condition (e.g. knock down of *iap2* increases *dip-t-luc* expression 2.23 fold in air, but suppress *dip-t-luc* expression 2.6-fold in 13% CO<sub>2</sub>).

<sup>2</sup>Welch LC, Lecuona E, Briva A, Trejo HE, Dada LA, Sznajder JI. FEBS Lett. 2010 Sep 24;584(18):3985-9

<sup>3</sup>Vadász I, Dada LA, Briva A, Trejo HE, Welch LC, Chen J, Tóth PT, Lecuona E, Witters LA, Schumacker PT, Chandel NS, Seeger W, Sznajder JI. J Clin Invest. 2008 Feb;118(2):752-62

<sup>4</sup>Lecuona E<sup>1</sup>, Sun H, Chen J, Trejo HE, Baker MA, Sznajder JI. Am J Respir Cell Mol Biol. 2013 May;48(5):626-34.

**Table SII: Primary and secondary screen results**

Data formatted as excel spreadsheets can be obtained by contacting the corresponding author, Prof. Greg J Beitel.

**Primary screen results: Z-scores for all dsRNAs in the primary screen with a value  $\geq 1.5$** 

| Gene             | z- score plate 1 | z- score plate 2 | avg. CO <sub>2</sub> z- score | DRSC Amplicon | CGs                                                                                                    | Human Homologene           | Human InParanoid                                        | selected for 2° screening? |
|------------------|------------------|------------------|-------------------------------|---------------|--------------------------------------------------------------------------------------------------------|----------------------------|---------------------------------------------------------|----------------------------|
| zfh2             | 6.24             | 3.60             | <b>4.92</b>                   | DRSC17178     | CG1449                                                                                                 |                            | ENSP00000050961,<br>ENSP00000268489                     | Yes                        |
| CG15625          | 5.25             | 3.99             | <b>4.62</b>                   | DRSC39009     | CG15625                                                                                                |                            |                                                         | Yes                        |
| CG40270          | 6.08             | 2.74             | <b>4.41</b>                   | DRSC37740     | CG40270                                                                                                |                            |                                                         | Yes                        |
| tna              | 5.12             | 3.04             | <b>4.08</b>                   | DRSC29530     | CG7958                                                                                                 | <b>ZMIZ1</b>               | ENSP00000311778,<br>ENSP00000334474                     | Yes                        |
| CG30441, CG10395 | 5.99             | 2.05             | <b>4.02</b>                   | DRSC27079     | CG30441:<br>CG30441;<br>CG10395:<br>CG10395                                                            | <b>CG10395:<br/>INO80B</b> | CG10395:<br>ENSP00000233331                             | Yes                        |
| CG11152          | 2.15             | 5.78             | <b>3.97</b>                   | DRSC26567     | CG11152                                                                                                |                            |                                                         | Yes                        |
| CG31847          | 4.61             | 3.24             | <b>3.93</b>                   | DRSC25815     | CG31847,<br>CG16851                                                                                    |                            |                                                         | Yes                        |
| zfh2             | 3.92             | 3.74             | <b>3.83</b>                   | DRSC28010     | CG1449                                                                                                 |                            | ENSP00000050961,<br>ENSP00000268489                     |                            |
| CG33111          | 3.17             | 4.27             | <b>3.72</b>                   | DRSC14444     | CG33111,<br>CG11957,<br>CG11945,<br>CG10193                                                            |                            |                                                         | Yes                        |
| tra2             |                  |                  | <b>3.71</b>                   | DRSC29704     | CG10128                                                                                                | <b>TRA2B</b>               | ENSP00000259043,<br>ENSP00000297071                     | Yes                        |
| CG42330          | 4.85             | 2.55             | <b>3.70</b>                   | DRSC10765     | CG42330,<br>CG18630,<br>CG13672,<br>CG33274,<br>CG7060                                                 |                            | ENSP00000302472,<br>ENSP00000315465                     | Yes                        |
| CG8239           | 3.89             | 3.50             | <b>3.70</b>                   | DRSC20096     | CG8239                                                                                                 | <b>MVD</b>                 | ENSP00000301012                                         | Yes                        |
| NAT1             | 3.23             | 4.14             | <b>3.69</b>                   | DRSC30053     | CG3845                                                                                                 | <b>EIF4G2</b>              | ENSP00000340281                                         | Yes                        |
| CycD             | 4.71             | 2.58             | <b>3.65</b>                   | DRSC25031     | CG9096                                                                                                 | <b>CCND2</b>               | ENSP00000227507,<br>ENSP00000230338,<br>ENSP00000261254 | Yes                        |
| CG11123          | 2.69             | 4.58             | <b>3.64</b>                   | DRSC06040     | CG11123                                                                                                | <b>C14orf21</b>            | ENSP00000267425                                         | Yes                        |
| zormin           | 2.89             | 4.34             | <b>3.62</b>                   | DRSC07969     | CG32310,<br>CG11850,<br>CG11952,<br>CG32309,<br>CG32311,<br>CG5699,<br>CG1282,<br>CG33484,<br>CG32307, |                            |                                                         | Yes                        |

|                  |      |      |             |           |                                                         |                           |                                                         |     |
|------------------|------|------|-------------|-----------|---------------------------------------------------------|---------------------------|---------------------------------------------------------|-----|
| tna              | 3.43 | 3.70 | <b>3.57</b> | DRSC29530 | CG7958                                                  | <b>ZMIZ1</b>              | ENSP00000311778,<br>ENSP00000334474                     | Yes |
| CG5767           | 4.88 | 2.17 | <b>3.53</b> | DRSC29980 | CG5767                                                  |                           |                                                         | Yes |
| Sos              |      |      | <b>3.52</b> | DRSC23624 | CG7793                                                  | <b>SOS1</b>               | ENSP00000263879,<br>ENSP00000346183                     | Yes |
| mam              | 1.00 | 6.02 | <b>3.51</b> | DRSC22971 | CG8118                                                  |                           |                                                         |     |
| Scr              |      |      | <b>3.49</b> | DRSC29201 | CG1030                                                  | <b>HOXB5</b>              | ENSP00000222726,<br>ENSP00000239151,<br>ENSP00000309336 | Yes |
| CG42313          | 1.84 | 5.10 | <b>3.47</b> | DRSC25118 | CG42313,<br>CG15277,<br>CG15275,<br>CG33515,<br>CG15276 |                           |                                                         | Yes |
| CG31772          | 3.45 | 3.34 | <b>3.40</b> | DRSC22869 | CG31772,<br>CG10020                                     |                           |                                                         | Yes |
| Cpr73D           | 5.07 | 1.71 | <b>3.39</b> | DRSC26591 | CG9665                                                  |                           |                                                         | Yes |
| CG3746           | 4.32 | 2.43 | <b>3.38</b> | DRSC30050 | CG3746                                                  |                           |                                                         | Yes |
| Rpt3R            | 4.03 | 2.71 | <b>3.37</b> | DRSC16501 | CG9475                                                  |                           |                                                         | Yes |
| twi              | 4.01 | 2.73 | <b>3.37</b> | DRSC26056 | CG2956                                                  |                           | ENSP00000242261                                         | Yes |
| HDC14093         | 3.09 | 3.61 | <b>3.35</b> | DRSC13217 |                                                         |                           |                                                         | Yes |
| phl              |      |      | <b>3.34</b> | DRSC36609 | CG2845                                                  | <b>BRAF</b>               | ENSP00000251849,<br>ENSP00000288602,<br>ENSP00000290277 | Yes |
| RhoGAP15B        | 2.81 | 3.83 | <b>3.32</b> | DRSC19925 | CG4937                                                  |                           |                                                         | Yes |
| HDC12864         | 3.32 | 3.32 | <b>3.32</b> | DRSC22204 |                                                         |                           |                                                         | Yes |
| CG31457          | 2.59 | 4.00 | <b>3.30</b> | DRSC29229 | CG31457,<br>CG4639                                      |                           |                                                         | Yes |
| CG5189, CG30120  | 3.71 | 2.86 | <b>3.29</b> | DRSC05726 | CG5189:<br>CG5189;<br>CG30120:<br>CG30120               | <b>CG5189:<br/>ROBLD3</b> | CG5189:<br>ENSP00000265204                              | Yes |
| CG6361           | 2.61 | 3.95 | <b>3.28</b> | DRSC22231 | CG6361                                                  |                           |                                                         | Yes |
| RnrS             |      |      | <b>3.28</b> | DRSC23541 | CG8975                                                  | <b>RRM2</b>               | ENSP00000251810,<br>ENSP00000302955                     | Yes |
| h-cup            | 1.02 | 5.51 | <b>3.27</b> | DRSC24713 | CG6130                                                  |                           |                                                         |     |
| ena              | 4.27 | 2.25 | <b>3.26</b> | DRSC25393 | CG15112                                                 |                           | ENSP00000347624,<br>ENSP00000351501                     | Yes |
| trx              | 3.91 | 2.59 | <b>3.25</b> | DRSC17089 | CG8651                                                  |                           |                                                         | Yes |
| CG7745           | 1.12 | 5.32 | <b>3.22</b> | DRSC29591 | CG7745                                                  |                           |                                                         |     |
| CG33920          | 1.00 | 5.42 | <b>3.21</b> | DRSC37813 | CG33920                                                 |                           |                                                         |     |
| Muc30E           | 2.32 | 4.08 | <b>3.20</b> | DRSC01101 | CG33300                                                 |                           | ENSP00000251819                                         | Yes |
| CG7320           | 3.86 | 2.54 | <b>3.20</b> | DRSC26050 | CG7320                                                  |                           |                                                         | Yes |
| CG32641, CG32640 | 2.06 | 4.25 | <b>3.16</b> | DRSC22885 | CG32641:<br>CG32641;<br>CG32640:<br>CG32640             |                           |                                                         | Yes |
| llp5             | 1.94 | 4.32 | <b>3.13</b> | DRSC08998 | CG33273                                                 |                           |                                                         | Yes |
| snRNP70K         | 3.63 | 2.61 | <b>3.12</b> | DRSC03612 | CG8749                                                  | <b>SNRNP70</b>            | ENSP00000221448                                         | Yes |
| cuff             | 4.91 | 1.30 | <b>3.11</b> | DRSC06315 | CG13190                                                 |                           |                                                         |     |
|                  | 4.99 | 1.23 | <b>3.11</b> | DRSC21304 |                                                         |                           |                                                         |     |
| gt               |      |      | <b>3.11</b> | DRSC28482 | CG7952                                                  |                           |                                                         | Yes |

|           |      |      |             |           |                                                        |                |                                                         |     |
|-----------|------|------|-------------|-----------|--------------------------------------------------------|----------------|---------------------------------------------------------|-----|
| CG12861   | 4.77 | 1.42 | <b>3.10</b> | DRSC24847 | CG12861                                                |                |                                                         |     |
| fffl      | 4.35 | 1.83 | <b>3.09</b> | DRSC16474 | CG9351                                                 | <b>SMEK2</b>   | ENSP00000310757,<br>ENSP00000339769                     | Yes |
| Tsp29Fb   | 2.86 | 3.21 | <b>3.04</b> | DRSC03233 | CG9496                                                 |                | ENSP00000003603,<br>ENSP00000286824                     | Yes |
| CG6860    | 1.44 | 4.64 | <b>3.04</b> | DRSC29145 | CG6860                                                 | <b>LRCH2</b>   | ENSP00000258643,<br>ENSP00000325091,                    | Yes |
| CG3099    | 3.16 | 2.84 | <b>3.00</b> | DRSC18276 | CG3099                                                 | <b>HECW2</b>   | ENSP00000260983,<br>ENSP00000265522                     | Yes |
| Cht2      | 3.34 | 2.65 | <b>3.00</b> | DRSC24801 | CG2054                                                 |                |                                                         | Yes |
| GABPI     | 2.09 | 3.86 | <b>2.98</b> | DRSC00494 | CG17257                                                | <b>ZDHC23</b>  | ENSP00000330485                                         | Yes |
| ced-6     | 4.11 | 1.84 | <b>2.98</b> | DRSC07591 | CG11804                                                | <b>GULP1</b>   | ENSP00000352047                                         | Yes |
| CG10592   | 2.26 | 3.69 | <b>2.98</b> | DRSC29230 | CG10592                                                |                | ENSP00000295450,                                        | Yes |
| Ggamma30A | 3.64 | 2.29 | <b>2.97</b> | DRSC03331 | CG3694,<br>CG18511                                     |                | ENSP00000248150                                         | Yes |
| bon       | 3.13 | 2.78 | <b>2.96</b> | DRSC16914 | CG15687,<br>CG5206                                     | <b>TRIM33</b>  | ENSP00000299550,<br>ENSP00000340507,<br>ENSP00000351250 | Yes |
| Tsp29Fa   | 3.82 | 2.08 | <b>2.95</b> | DRSC28522 | CG9494                                                 | <b>CD63</b>    | ENSP00000257857                                         | Yes |
| CG31612   | 3.63 | 2.25 | <b>2.94</b> | DRSC03697 | CG31612,<br>CG11631,                                   |                |                                                         | Yes |
| Bx        | 2.70 | 3.18 | <b>2.94</b> | DRSC28506 | CG6500                                                 | <b>LMO1</b>    | ENSP00000338207,<br>ENSP00000346689                     | Yes |
| RhoGAP18B | 3.49 | 2.36 | <b>2.93</b> | DRSC20048 | CG42274,<br>CG17015,<br>CG7502,<br>CG7531,<br>CG7481   |                |                                                         | Yes |
| CG13599   | 2.67 | 3.17 | <b>2.92</b> | DRSC14602 | CG13599                                                |                |                                                         | Yes |
| CG30438   | 3.95 | 1.85 | <b>2.90</b> | DRSC21419 | CG30438                                                | <b>UGT2B17</b> | ENSP00000311648                                         | Yes |
| CG9715    | 2.29 | 3.50 | <b>2.90</b> | DRSC25470 | CG9715                                                 |                |                                                         | Yes |
| mts       |      |      | <b>2.90</b> | DRSC36626 | CG7109                                                 | <b>PPP2CB</b>  | ENSP00000221138,                                        | Yes |
| prom      | 3.32 | 2.45 | <b>2.89</b> | DRSC24876 | CG30165,<br>CG4556,<br>CG30164,<br>CG42310,<br>CG30166 |                | ENSP00000318520                                         | Yes |
| csw       |      |      | <b>2.87</b> | DRSC36600 | CG3954                                                 | <b>PTPN11</b>  | ENSP00000340944,<br>ENSP00000351285                     | Yes |
| Rbp1-like | 3.09 | 2.57 | <b>2.83</b> | DRSC22075 | CG1987                                                 | <b>SFRS3</b>   |                                                         | Yes |
| Use1      | 2.05 | 3.61 | <b>2.83</b> | DRSC26772 | CG14181                                                | <b>USE1</b>    | ENSP00000263897                                         | Yes |
| CG2983    | 2.38 | 3.27 | <b>2.83</b> | DRSC38931 | CG2983                                                 |                |                                                         | Yes |
| CLIP-190  | 3.50 | 2.14 | <b>2.82</b> | DRSC30075 | CG5020                                                 | <b>CLIP1</b>   | ENSP00000223398,<br>ENSP00000351665                     | Yes |
| CG34180   | 2.20 | 3.44 | <b>2.82</b> | DRSC38745 | CG34180                                                |                |                                                         | Yes |
| Cyp18a1   | 2.34 | 3.27 | <b>2.81</b> | DRSC27063 | CG6816                                                 | <b>CYP2U1</b>  | ENSP00000257149,                                        | Yes |

|                  |      |      |             |           |                                |                 |                                                         |     |
|------------------|------|------|-------------|-----------|--------------------------------|-----------------|---------------------------------------------------------|-----|
| wntD             | 3.03 | 2.59 | <b>2.81</b> | DRSC28538 | CG8458                         |                 |                                                         | Yes |
| sba              | 3.85 | 1.72 | <b>2.79</b> | DRSC17050 | CG13598                        |                 |                                                         | Yes |
| CG5599           | 3.56 | 2.01 | <b>2.79</b> | DRSC25764 | CG5599                         | <b>DBT</b>      | ENSP00000260559                                         | Yes |
| tre-1            | 3.70 | 1.85 | <b>2.78</b> | DRSC38645 | CG34649                        |                 |                                                         | Yes |
| CG7214           | 2.16 | 3.37 | <b>2.77</b> | DRSC03028 | CG7214                         |                 |                                                         | Yes |
| Muc68E           | 1.59 | 3.95 | <b>2.77</b> | DRSC09146 | CG33265                        |                 |                                                         |     |
| bl               | 2.28 | 3.22 | <b>2.75</b> | DRSC07585 | CG13425                        |                 | ENSP00000317788,<br>ENSP00000333256,<br>ENSP00000341659 | Yes |
| CG4168           | 1.83 | 3.63 | <b>2.73</b> | DRSC22789 | CG4168                         |                 |                                                         | Yes |
| Gen              | 2.19 | 3.25 | <b>2.72</b> | DRSC09679 | CG10670                        | <b>GEN1</b>     | ENSP00000318977                                         |     |
| Arp8             | 2.64 | 2.75 | <b>2.70</b> | DRSC20059 | CG7846                         | <b>ACTR8</b>    | ENSP00000336842                                         |     |
| CG14632          | 4.08 | 1.32 | <b>2.70</b> | DRSC25845 | CG14632                        |                 |                                                         |     |
| CG11768          | 2.11 | 3.29 | <b>2.70</b> | DRSC29630 | CG11768                        |                 |                                                         |     |
| CG11367, CG32454 | 4.35 | 1.03 | <b>2.69</b> | DRSC11652 | CG11367:                       |                 | CG11367:                                                |     |
| Empty Control    | 3.67 | 1.71 | <b>2.69</b> |           |                                |                 |                                                         |     |
| CG8444           | 3.07 | 2.28 | <b>2.68</b> | DRSC16420 | CG8444                         | <b>ATP6AP2</b>  | ENSP00000331703                                         | Yes |
| CG5522           | 3.23 | 2.11 | <b>2.67</b> | DRSC06941 | CG5522                         | <b>RALGPS1</b>  | ENSP00000259351,<br>ENSP00000263728                     | Yes |
|                  | 3.19 | 2.14 | <b>2.67</b> | DRSC14535 |                                |                 |                                                         | Yes |
| Empty Control    | 2.66 | 2.68 | <b>2.67</b> |           |                                |                 |                                                         |     |
| Shaw             | 3.03 | 2.27 | <b>2.65</b> | DRSC00788 | CG2822,                        |                 | ENSP00000241333,                                        | Yes |
| CG14590          | 4.11 | 1.18 | <b>2.65</b> | DRSC04867 | CG14590                        |                 |                                                         |     |
| CG1707           | 3.03 | 2.27 | <b>2.65</b> | DRSC06657 | CG1707                         | <b>GLO1</b>     | ENSP00000244746                                         |     |
| beat-lc          | 3.68 | 1.61 | <b>2.65</b> | DRSC23508 | CG4838                         |                 |                                                         |     |
| CG14717          | 2.34 | 2.93 | <b>2.64</b> | DRSC14940 | CG14717                        |                 |                                                         |     |
| sra              | 2.23 | 3.03 | <b>2.63</b> | DRSC17015 | CG6072                         | <b>RCAN2</b>    | ENSP00000236261,<br>ENSP00000305223,<br>ENSP00000320768 | Yes |
| CG33639          | 3.54 | 1.72 | <b>2.63</b> | DRSC23778 | CG33639,<br>CG5936,<br>CG16958 |                 |                                                         |     |
| CG7051           | 2.46 | 2.79 | <b>2.63</b> | DRSC27636 | CG7051                         | <b>WDR78</b>    |                                                         | Yes |
| CG6569           | 3.23 | 2.01 | <b>2.62</b> | DRSC16067 | CG6569                         |                 |                                                         |     |
| CG1308           | 2.70 | 2.54 | <b>2.62</b> | DRSC24732 | CG1308                         |                 |                                                         |     |
| aly              | 3.32 | 1.90 | <b>2.61</b> | DRSC39161 | CG2075                         |                 |                                                         |     |
| CG31648          | 2.11 | 3.08 | <b>2.60</b> | DRSC22692 | CG31648,<br>CG6922             | <b>COX11</b>    | ENSP00000299335                                         | Yes |
| Toll-7           | 2.61 | 2.57 | <b>2.59</b> | DRSC29640 | CG8595                         |                 | ENSP00000260010                                         | Yes |
| CG9279           | 2.99 | 2.16 | <b>2.58</b> | DRSC11057 | CG9279                         |                 |                                                         |     |
| xmas-2           | 2.94 | 2.22 | <b>2.58</b> | DRSC22178 | CG8919,                        |                 | ENSP00000291688                                         | Yes |
| Sln              | 2.10 | 3.04 | <b>2.57</b> | DRSC07133 | CG8271                         | <b>SLC16A12</b> |                                                         | Yes |

|                                  |      |      |             |           |                                 |                       |                                     |     |
|----------------------------------|------|------|-------------|-----------|---------------------------------|-----------------------|-------------------------------------|-----|
| Pros28.1A                        | 2.82 | 2.31 | <b>2.57</b> | DRSC16800 | CG17268                         |                       | ENSP00000217153,<br>ENSP00000311121 | Yes |
| HDC15639 ('+' in<br>Stolc et al) | 2.73 | 2.40 | <b>2.57</b> | DRSC29010 |                                 |                       |                                     |     |
| conv                             | 2.75 | 2.36 | <b>2.56</b> | DRSC07213 | CG8561                          |                       |                                     | Yes |
| CG4933                           | 2.11 | 3.00 | <b>2.56</b> | DRSC10461 | CG4933                          | <b>OSGEP</b>          | ENSP00000206542                     | Yes |
| Mitf                             | 3.01 | 2.11 | <b>2.56</b> | DRSC17212 | CG40476,                        |                       | ENSP00000265440,                    | Yes |
| CG42339                          | 2.69 | 2.41 | <b>2.55</b> | DRSC19481 | CG42339,<br>CG12626,<br>CG15204 |                       |                                     |     |
| CG2813                           | 2.93 | 2.15 | <b>2.54</b> | DRSC00538 | CG2813                          |                       |                                     |     |
| Rpb11                            | 2.79 | 2.29 | <b>2.54</b> | DRSC02995 | CG6840                          | <b>POLR2J</b>         | ENSP00000315849                     | Yes |
| CG10321                          | 3.03 | 2.04 | <b>2.54</b> | DRSC04061 | CG10321                         |                       |                                     |     |
| HDC07158                         | 2.60 | 2.47 | <b>2.54</b> | DRSC05730 |                                 |                       |                                     |     |
| retinophilin                     | 2.94 | 2.14 | <b>2.54</b> | DRSC12132 | CG10233                         | <b>MORN4</b>          | ENSP00000335498                     | Yes |
| CG13117                          | 2.53 | 2.55 | <b>2.54</b> | DRSC26983 | CG13117                         |                       |                                     |     |
| ash1                             | 2.83 | 2.23 | <b>2.53</b> | DRSC11325 | CG8887                          |                       |                                     |     |
| Rgk2                             | 1.08 | 3.97 | <b>2.53</b> | DRSC21651 | CG34390,                        | <b>REM1</b>           | ENSP00000201979                     |     |
| fas                              | 3.43 | 1.63 | <b>2.53</b> | DRSC23756 | CG17716                         |                       |                                     |     |
| CG9915                           | 3.07 | 1.97 | <b>2.52</b> | DRSC21565 | CG9915                          | <b>IWS1</b>           | ENSP00000295321                     | Yes |
| CG8451                           | 2.96 | 2.03 | <b>2.50</b> | DRSC03088 | CG8451                          |                       |                                     |     |
| Muc55B                           | 3.97 | 1.02 | <b>2.50</b> | DRSC21440 | CG5765                          |                       |                                     |     |
| CG31457                          | 2.44 | 2.56 | <b>2.50</b> | DRSC22935 | CG31457,                        |                       |                                     |     |
| CG5278                           | 2.70 | 2.27 | <b>2.49</b> | DRSC15760 | CG5278                          |                       |                                     |     |
| n-syb                            | 1.75 | 3.23 | <b>2.49</b> | DRSC27077 | CG17248                         | <b>VAMP1</b>          | ENSP00000314214,                    | Yes |
| CG42234                          | 1.45 | 3.50 | <b>2.48</b> | DRSC08394 | CG42234,                        |                       | ENSP00000227256                     | Yes |
| TwdlL                            | 2.73 | 2.22 | <b>2.48</b> | DRSC16042 | CG6447                          |                       |                                     |     |
| CG9747                           | 3.44 | 1.52 | <b>2.48</b> | DRSC16554 | CG9747                          |                       |                                     |     |
| Map205                           | 2.17 | 2.78 | <b>2.48</b> | DRSC16732 | CG1483                          |                       |                                     |     |
| CG8578                           | 2.08 | 2.88 | <b>2.48</b> | DRSC20114 | CG8578                          |                       | ENSP00000338727                     |     |
| Dad                              | 2.18 | 2.78 | <b>2.48</b> | DRSC28345 | CG5201                          | <b>SMAD7</b>          |                                     | Yes |
| dpa                              | 2.33 | 2.59 | <b>2.46</b> | DRSC07604 | CG1616                          | <b>MCM4</b>           | ENSP00000262105                     |     |
| scaf6                            | 2.37 | 2.54 | <b>2.46</b> | DRSC10676 | CG6626,                         | <b>CHERP</b>          | ENSP00000198939                     | Yes |
| CG12213                          | 1.14 | 3.77 | <b>2.46</b> | DRSC22109 | CG12213                         |                       |                                     |     |
| CG17364                          | 1.28 | 3.64 | <b>2.46</b> | DRSC22689 | CG17364                         |                       |                                     |     |
| CG10177                          | 2.66 | 2.25 | <b>2.46</b> | DRSC27888 | CG10177                         |                       |                                     |     |
| Rrp4                             | 3.77 | 1.15 | <b>2.46</b> | DRSC29543 | CG3931                          | <b>EXOSC2</b>         | ENSP00000253010                     |     |
| CG42514, CG42513                 | 1.94 | 2.96 | <b>2.45</b> | DRSC10428 | CG42514:                        | <b>CG42513: ADCY5</b> | CG42514:                            | Yes |

|                    |      |      |             |           |                   |                       |                                     |     |
|--------------------|------|------|-------------|-----------|-------------------|-----------------------|-------------------------------------|-----|
| CG1969             | 1.79 | 3.10 | <b>2.45</b> | DRSC15405 | CG1969            | <b>GNPNAT1</b>        | ENSP00000216410                     | Yes |
| mRpl30             | 2.17 | 2.73 | <b>2.45</b> | DRSC18416 | CG7038            |                       | ENSP00000338057                     |     |
| Cktalpha           | 2.47 | 2.42 | <b>2.45</b> | DRSC20231 | CG2028            | <b>CSNK1A1L</b>       | ENSP00000261798,<br>ENSP00000322723 | Yes |
| CG31549            | 3.62 | 1.28 | <b>2.45</b> | DRSC21688 | CG31549,          |                       | ENSP00000263278                     |     |
| slp2               | 3.47 | 1.43 | <b>2.45</b> | DRSC26622 | CG2939            |                       | ENSP00000339004                     | Yes |
| CG8783             | 1.93 | 2.95 | <b>2.44</b> | DRSC11044 | CG8783            | <b>C16orf35</b>       | ENSP00000262313                     |     |
| CG10703            | 2.66 | 2.21 | <b>2.44</b> | DRSC29299 | CG10703           | <b>GCC1</b>           | ENSP00000318821                     | Yes |
| CG4259             | 3.67 | 1.21 | <b>2.44</b> | DRSC29614 | CG4259            |                       |                                     |     |
| HDC01093           | 1.10 | 3.75 | <b>2.43</b> | DRSC00929 |                   |                       |                                     |     |
| CG2292             | 3.81 | 1.04 | <b>2.43</b> | DRSC06837 | CG2292            | <b>PIGN</b>           | ENSP00000350263                     |     |
| Rh6                | 3.11 | 1.74 | <b>2.43</b> | DRSC16823 | CG5192            | <b>OPN4</b>           | ENSP00000241891                     | Yes |
| MED26              | 1.63 | 3.23 | <b>2.43</b> | DRSC17148 | CG1823,<br>CG1793 |                       |                                     |     |
| CG32533            | 2.44 | 2.41 | <b>2.43</b> | DRSC19443 | CG32533,          | <b>DHX34</b>          | ENSP00000331907                     |     |
| Lcp65Ab2, Lcp65Ab1 | 2.84 | 2.02 | <b>2.43</b> | DRSC29739 | Lcp65Ab2:         |                       |                                     |     |
| Ugt37a1            | 3.27 | 1.56 | <b>2.42</b> | DRSC02114 | CG11012           |                       |                                     |     |
| CSN3               | 2.31 | 2.52 | <b>2.42</b> | DRSC11859 | CG18332           | <b>COPS3</b>          | ENSP00000268717                     | Yes |
| Eig71Ei            | 3.52 | 1.32 | <b>2.42</b> | DRSC29123 | CG7327            |                       |                                     | Yes |
| Rev1               | 2.36 | 2.46 | <b>2.41</b> | DRSC08264 | CG12189           | <b>REV1</b>           | ENSP00000258428                     | Yes |
| HLH106             | 2.91 | 1.90 | <b>2.41</b> | DRSC11182 | CG8522            | <b>SREBF1</b>         | ENSP00000261646,<br>ENSP00000355169 |     |
| CG32547            | 1.36 | 3.46 | <b>2.41</b> | DRSC19263 | CG32547,          |                       |                                     |     |
| CG15337            | 3.37 | 1.44 | <b>2.41</b> | DRSC22778 | CG15337           |                       |                                     |     |
| CG42303, CG42304   | 3.09 | 1.73 | <b>2.41</b> | DRSC23772 | CG42303:          | <b>CG42304: SNUPN</b> | CG42303:                            | Yes |
| CG30105            | 1.51 | 3.28 | <b>2.40</b> | DRSC05668 | CG30105           |                       | ENSP00000308193                     |     |
| Cyp6a14            | 2.43 | 2.37 | <b>2.40</b> | DRSC07376 | CG8687            |                       |                                     |     |
| Anxb11             | 3.48 | 1.32 | <b>2.40</b> | DRSC19331 | CG9968            | <b>ANXA7</b>          | ENSP00000265447,                    |     |
| CG8097             | 2.19 | 2.61 | <b>2.40</b> | DRSC20079 | CG8097            |                       | ENSP00000344989                     |     |



|                   |      |      |      |           |                                            |                     |                                                         |     |
|-------------------|------|------|------|-----------|--------------------------------------------|---------------------|---------------------------------------------------------|-----|
| CG32856           | 3.25 | 1.54 | 2.40 | DRSC29746 | CG32856                                    |                     |                                                         |     |
| SerT              | 3.24 | 1.53 | 2.39 | DRSC04655 | CG4545                                     |                     | ENSP00000261707                                         | Yes |
| CG32368           | 2.37 | 2.41 | 2.39 | DRSC25473 | CG32368                                    |                     |                                                         |     |
| Ir68b             | 2.23 | 2.52 | 2.38 | DRSC10251 | CG17152                                    |                     |                                                         | Yes |
| mfr               | 2.58 | 2.17 | 2.38 | DRSC10543 | CG5747                                     |                     | ENSP00000258104,                                        | Yes |
| CG3773            | 2.17 | 2.59 | 2.38 | DRSC15513 | CG3773                                     |                     |                                                         |     |
| CG31266, CG4053   | 2.69 | 2.07 | 2.38 | DRSC29364 | CG31266;<br>CG31266,<br>CG5240;<br>CG4053: |                     |                                                         |     |
| CG17107           | 2.47 | 2.26 | 2.37 | DRSC02575 | CG17107                                    |                     |                                                         |     |
| shn               | 2.10 | 2.64 | 2.37 | DRSC05266 | CG7734                                     |                     |                                                         | Yes |
| mud               | 3.16 | 1.57 | 2.37 | DRSC19019 | CG12047                                    |                     |                                                         |     |
| CG33251, CG9915   | 2.31 | 2.42 | 2.37 | DRSC20217 | CG33251:<br>CG33251;<br>CG9915:<br>CG9915  | <b>CG9915: IWS1</b> | CG9915:<br>ENSP00000295321                              |     |
| Mms19             | 3.11 | 1.63 | 2.37 | DRSC27172 | CG12005                                    | <b>MMS19</b>        | ENSP00000307263                                         |     |
| CG40413           | 3.04 | 1.70 | 2.37 | DRSC37772 | CG40413                                    |                     |                                                         |     |
| CG10264           | 1.18 | 3.54 | 2.36 | DRSC14222 | CG10264                                    |                     |                                                         |     |
| CG32699           | 2.88 | 1.84 | 2.36 | DRSC18257 | CG32699,                                   | <b>LPCAT1</b>       | ENSP00000262134,                                        | Yes |
| scyl              | 1.69 | 3.03 | 2.36 | DRSC27699 | CG7590                                     |                     | ENSP00000307305,<br>ENSP00000354830                     | Yes |
| Aplip1            | 2.96 | 1.74 | 2.35 | DRSC08697 | CG1200                                     |                     | ENSP00000241014,<br>ENSP00000330572,<br>ENSP00000337509 | Yes |
| Scsalpha          | 2.98 | 1.72 | 2.35 | DRSC08698 | CG1065                                     | <b>SUCLG1</b>       | ENSP00000295783                                         | Yes |
| CG5220            | 1.81 | 2.88 | 2.35 | DRSC15741 | CG5220                                     | <b>FTSJ1</b>        | ENSP00000326948                                         |     |
| Hsp70Bb, Hsp70Ba, | 1.02 | 3.68 | 2.35 | DRSC21248 | Hsp70Bb:                                   | <b>Hsp70Bb:</b>     |                                                         | Yes |
| CG14420           | 2.45 | 2.25 | 2.35 | DRSC25167 | CG14420                                    |                     |                                                         |     |
| CG15141           | 3.25 | 1.45 | 2.35 | DRSC29031 | CG15141                                    | <b>UBR7</b>         | ENSP0000013070                                          | Yes |
| CG14453           | 1.77 | 2.90 | 2.34 | DRSC11710 | CG14453                                    |                     |                                                         |     |

|                  |      |      |             |           |                                                                 |                            |                                                                                                                                                                                                                                                                                                |     |
|------------------|------|------|-------------|-----------|-----------------------------------------------------------------|----------------------------|------------------------------------------------------------------------------------------------------------------------------------------------------------------------------------------------------------------------------------------------------------------------------------------------|-----|
| CG6782, CG6783   | 2.15 | 2.53 | <b>2.34</b> | DRSC16114 | CG6782:<br>CG6782,<br>CG31305;<br>CG6783:<br>CG6783,<br>CG31305 | <b>CG6782:<br/>SLC25A1</b> | CG6782:<br>ENSP00000215882,<br>CG6783:<br>ENSP00000237789,<br>CG6783:<br>ENSP00000241156,<br>CG6783:<br>ENSP00000256103,<br>CG6783:<br>ENSP00000256104,<br>CG6783:<br>ENSP00000297258,<br>CG6783:<br>ENSP00000300149,<br>CG6783:<br>ENSP00000311616,<br>CG6783:<br>ENSP00000348931,<br>CG6783: | Yes |
| CR18275, CG13373 | 1.19 | 3.48 | <b>2.34</b> | DRSC17900 | CR18275:<br>CG18275;<br>CG13373:<br>CG13373                     |                            |                                                                                                                                                                                                                                                                                                |     |
| ct               | 3.06 | 1.62 | <b>2.34</b> | DRSC25100 | CG11387                                                         |                            | ENSP00000261726,                                                                                                                                                                                                                                                                               | Yes |
| CG11413, CG4622  | 3.47 | 1.19 | <b>2.33</b> | DRSC04109 | CG11413:<br>CG11413;<br>CG4622:<br>CG4622                       | <b>CG4622: ZCCHC8</b>      | CG4622:<br>ENSP00000337313                                                                                                                                                                                                                                                                     |     |
| CG18604          | 1.42 | 3.23 | <b>2.33</b> | DRSC06771 | CG18604                                                         |                            |                                                                                                                                                                                                                                                                                                |     |
| GckIII           | 1.53 | 3.13 | <b>2.33</b> | DRSC15729 | CG5169                                                          | <b>STK25</b>               | ENSP00000261573,<br>ENSP00000276210,<br>ENSP00000325748                                                                                                                                                                                                                                        | Yes |
| Hex-t2           | 1.49 | 3.16 | <b>2.33</b> | DRSC28247 | CG32849,                                                        | <b>HK1</b>                 | ENSP00000223366,                                                                                                                                                                                                                                                                               |     |
| sca              | 2.37 | 2.26 | <b>2.32</b> | DRSC07677 | CG17579                                                         |                            |                                                                                                                                                                                                                                                                                                |     |
| I(3)04053        | 2.11 | 2.53 | <b>2.32</b> | DRSC11640 | CG11238                                                         |                            |                                                                                                                                                                                                                                                                                                |     |
| CG6490           | 2.28 | 2.36 | <b>2.32</b> | DRSC16054 | CG6490                                                          |                            |                                                                                                                                                                                                                                                                                                |     |
| CG42268          | 2.11 | 2.52 | <b>2.32</b> | DRSC29387 | CG42268,                                                        |                            |                                                                                                                                                                                                                                                                                                |     |
| CG2943           | 3.00 | 1.62 | <b>2.31</b> | DRSC15455 | CG2943                                                          | <b>KIAA0090</b>            | ENSP00000264214                                                                                                                                                                                                                                                                                |     |

|                                                   |      |      |             |           |                                             |                            |                                                                                                                                                                                                                         |     |
|---------------------------------------------------|------|------|-------------|-----------|---------------------------------------------|----------------------------|-------------------------------------------------------------------------------------------------------------------------------------------------------------------------------------------------------------------------|-----|
| Ugt86Dh                                           | 2.19 | 2.43 | <b>2.31</b> | DRSC15641 | CG4772                                      |                            | ENSP00000251566,<br>ENSP00000265403,<br>ENSP00000286604,<br>ENSP00000304507,<br>ENSP00000304811,<br>ENSP00000305221,<br>ENSP00000311792,<br>ENSP00000320401,<br>ENSP00000327082,<br>ENSP00000334276,<br>ENSP00000342145 | Yes |
| CG8543                                            | 2.53 | 2.08 | <b>2.31</b> | DRSC25399 | CG8543                                      |                            |                                                                                                                                                                                                                         |     |
| HDC05705 ('+' in Stolc et al) ('+' in Hild et al) | 3.53 | 1.08 | <b>2.31</b> | DRSC28261 |                                             |                            |                                                                                                                                                                                                                         |     |
| HDC09489 ('+' in Stolc et al) ('+' in Hild et al) | 2.80 | 1.80 | <b>2.30</b> | DRSC09056 |                                             |                            |                                                                                                                                                                                                                         |     |
| CG17803                                           | 2.11 | 2.48 | <b>2.30</b> | DRSC15275 | CG17803                                     |                            |                                                                                                                                                                                                                         |     |
| CG42339                                           | 3.28 | 1.32 | <b>2.30</b> | DRSC21843 | CG42339,<br>CG12626,<br>CG15204             |                            |                                                                                                                                                                                                                         |     |
| Pgk                                               | 2.15 | 2.44 | <b>2.30</b> | DRSC23340 | CG3127                                      | <b>PGK1</b>                | ENSP00000218265,                                                                                                                                                                                                        | Yes |
| Ubqn                                              | 1.68 | 2.91 | <b>2.30</b> | DRSC24055 | CG14224                                     | <b>UBQLN1</b>              | ENSP00000292319,<br>ENSP00000297810,<br>ENSP00000345195                                                                                                                                                                 | Yes |
| swm                                               | 3.30 | 1.28 | <b>2.29</b> | DRSC02012 | CG10084                                     | <b>RBM26</b>               | ENSP00000265271,                                                                                                                                                                                                        |     |
| CG14903                                           | 1.03 | 3.54 | <b>2.29</b> | DRSC15024 | CG14903                                     | <b>C2orf79</b>             | ENSP00000330389                                                                                                                                                                                                         |     |
| sbr                                               | 3.36 | 1.22 | <b>2.29</b> | DRSC20368 | CG1664,<br>CG17335                          | <b>NXF1</b>                | ENSP00000263032,<br>ENSP00000294172,                                                                                                                                                                                    |     |
| fd96Ca                                            | 2.75 | 1.83 | <b>2.29</b> | DRSC23974 | CG11921                                     |                            | ENSP00000304004                                                                                                                                                                                                         | Yes |
| CG5150                                            | 2.93 | 1.63 | <b>2.28</b> | DRSC10486 | CG5150                                      |                            | ENSP00000295450,<br>ENSP00000295453,<br>ENSP00000295463,<br>ENSP00000343937                                                                                                                                             |     |
| byn                                               | 2.20 | 2.35 | <b>2.28</b> | DRSC11332 | CG7260                                      | <b>T</b>                   | ENSP00000271394,<br>ENSP00000296946                                                                                                                                                                                     | Yes |
| CG14907, CG14906                                  | 2.96 | 1.59 | <b>2.28</b> | DRSC15026 | CG14907:<br>CG14907;<br>CG14906:<br>CG14906 | <b>CG14906:<br/>METTL4</b> | CG14906:<br>ENSP00000320349                                                                                                                                                                                             |     |
| CG32371                                           | 1.95 | 2.60 | <b>2.28</b> | DRSC22209 | CG32371                                     |                            | ENSP00000217347,<br>ENSP00000233121,<br>ENSP00000300249                                                                                                                                                                 |     |
| CG14177                                           | 1.83 | 2.71 | <b>2.27</b> | DRSC10176 | CG14177                                     |                            |                                                                                                                                                                                                                         |     |
| CG31294                                           | 2.75 | 1.78 | <b>2.27</b> | DRSC22217 | CG31294                                     |                            |                                                                                                                                                                                                                         |     |
| CG7465                                            | 2.15 | 2.38 | <b>2.27</b> | DRSC23943 | CG7465                                      |                            |                                                                                                                                                                                                                         |     |

|             |      |      |             |           |                     |                 |                                      |     |
|-------------|------|------|-------------|-----------|---------------------|-----------------|--------------------------------------|-----|
| Pgd         | 1.85 | 2.68 | <b>2.27</b> | DRSC39148 | CG3724              | <b>PGD</b>      | ENSP00000270776                      | Yes |
| CG10137     | 1.91 | 2.61 | <b>2.26</b> | DRSC02014 | CG10137             | <b>KIAA0562</b> | ENSP00000263739                      | Yes |
| CG18493     | 2.47 | 2.05 | <b>2.26</b> | DRSC15334 | CG18493             |                 |                                      |     |
| Bap         | 1.89 | 2.62 | <b>2.26</b> | DRSC23868 | CG12532             | <b>AP1B1</b>    | ENSP00000314414,                     | Yes |
| CG17386     | 2.33 | 2.18 | <b>2.26</b> | DRSC29366 | CG17386             |                 | ENSP00000299213                      |     |
| Cenp-C      | 2.85 | 1.67 | <b>2.26</b> | DRSC29707 | CG11746,            |                 |                                      |     |
| GFP Control | 2.90 | 1.61 | <b>2.26</b> |           |                     |                 |                                      |     |
| CG1663      | 1.99 | 2.50 | <b>2.25</b> | DRSC06613 | CG1663              |                 |                                      |     |
| CG11307     | 2.69 | 1.81 | <b>2.25</b> | DRSC11648 | CG11307             |                 |                                      |     |
| Dip-B       | 2.14 | 2.36 | <b>2.25</b> | DRSC25975 | CG9285              |                 |                                      |     |
| FucT6       | 2.61 | 1.89 | <b>2.25</b> | DRSC26057 | CG2448              | <b>FUT8</b>     | ENSP00000353910                      | Yes |
| Ptpmeg      | 1.90 | 2.58 | <b>2.24</b> | DRSC08684 | CG1228              | <b>PTPN4</b>    | ENSP00000262539,<br>ENSP00000263708  | Yes |
| Ca-beta     | 2.23 | 2.25 | <b>2.24</b> | DRSC23813 | CG6320,<br>CG14923, | <b>CACNB2</b>   | ENSP00000201943,<br>ENSP00000320025, | Yes |
| Btk29A      | 2.87 | 1.58 | <b>2.23</b> | DRSC02666 | CG18355,            | <b>TEC</b>      | ENSP00000231189,                     | Yes |
| CG3925      | 3.26 | 1.20 | <b>2.23</b> | DRSC15521 | CG3925              | <b>CRBN</b>     | ENSP00000231948                      |     |
| CG17597     | 3.10 | 1.36 | <b>2.23</b> | DRSC24788 | CG17597             |                 | ENSP00000262668                      | Yes |
| CG31958     | 3.07 | 1.39 | <b>2.23</b> | DRSC25319 | CG31958,            |                 |                                      |     |
| CG5466      | 3.21 | 1.25 | <b>2.23</b> | DRSC25795 | CG5466              |                 |                                      |     |
| CG15649     | 2.23 | 2.22 | <b>2.23</b> | DRSC29626 | CG15649             |                 |                                      |     |
| CG31798     | 3.19 | 1.25 | <b>2.22</b> | DRSC01702 | CG31798             |                 |                                      |     |
| CG11034     | 2.32 | 2.12 | <b>2.22</b> | DRSC02122 | CG11034             | <b>DPP4</b>     | ENSP00000188790,                     | Yes |
| CG3253      | 2.47 | 1.96 | <b>2.22</b> | DRSC04350 | CG3253              | <b>B3GNT1</b>   | ENSP00000309096                      |     |
| CG6834      | 2.95 | 1.49 | <b>2.22</b> | DRSC16125 | CG6834              |                 |                                      |     |
| CG7084      | 2.94 | 1.50 | <b>2.22</b> | DRSC16194 | CG7084              |                 |                                      |     |
| CG9009      | 2.02 | 2.41 | <b>2.22</b> | DRSC19064 | CG9009              |                 |                                      |     |
| CG5794      | 1.31 | 3.13 | <b>2.22</b> | DRSC23167 | CG5794              | <b>USP34</b>    | ENSP00000263989                      | Yes |
| CG13407     | 1.87 | 2.57 | <b>2.22</b> | DRSC25675 | CG13407             |                 |                                      |     |
| AcCoAS      | 2.77 | 1.66 | <b>2.22</b> | DRSC25972 | CG9390              | <b>ACSS2</b>    | ENSP00000253382                      | Yes |
| Tango9      | 1.58 | 2.83 | <b>2.21</b> | DRSC14173 | CG10007             |                 | ENSP00000350792                      |     |
| CR41604     | 1.50 | 2.92 | <b>2.21</b> | DRSC38594 |                     |                 |                                      |     |
| CG6388      | 2.25 | 2.14 | <b>2.20</b> | DRSC02951 | CG6388              | <b>TRMT1</b>    | ENSP00000319457,<br>ENSP00000331394  |     |
| CG9548      | 1.91 | 2.49 | <b>2.20</b> | DRSC03261 | CG9548              | <b>PHF5A</b>    | ENSP00000216252                      |     |

|                  |      |      |             |           |                                                                                              |                |                                                                             |     |
|------------------|------|------|-------------|-----------|----------------------------------------------------------------------------------------------|----------------|-----------------------------------------------------------------------------|-----|
| Mical            | 2.89 | 1.51 | <b>2.20</b> | DRSC14351 | CG18667,<br>CG18484,<br>CG18668,<br>CG33208,<br>CG11687,<br>CG33190,<br>CG11685,<br>CG322186 |                | ENSP00000207726,<br>ENSP00000256194                                         | Yes |
| CG32686          | 1.44 | 2.95 | <b>2.20</b> | DRSC17645 | CG32686                                                                                      |                |                                                                             |     |
| CG14995          | 2.85 | 1.54 | <b>2.20</b> | DRSC22991 | CG14995                                                                                      |                | ENSP00000270115                                                             | Yes |
| hang             | 1.59 | 2.81 | <b>2.20</b> | DRSC23216 | CG4416,                                                                                      |                |                                                                             |     |
| HDC08793 ('+' in | 2.05 | 2.34 | <b>2.20</b> | DRSC25305 |                                                                                              |                |                                                                             |     |
| cpo, CG42457     | 1.80 | 2.60 | <b>2.20</b> | DRSC25799 | cpo: CG31243,                                                                                |                | cpo:                                                                        | Yes |
| CG9797           | 1.62 | 2.77 | <b>2.20</b> | DRSC29073 | CG9797                                                                                       |                |                                                                             |     |
| CG33482          | 1.64 | 2.76 | <b>2.20</b> | DRSC38625 | CG33482,                                                                                     |                |                                                                             |     |
| Empty Control    | 1.85 | 2.54 | <b>2.20</b> |           |                                                                                              |                |                                                                             |     |
| kis              | 1.47 | 2.91 | <b>2.19</b> | DRSC00625 | CG18326,<br>CG3696,<br>CG3660                                                                | <b>CHD7</b>    | ENSP00000219084,<br>ENSP00000244003,<br>ENSP00000262707,<br>ENSP00000307304 | Yes |
| CG32263          | 2.74 | 1.63 | <b>2.19</b> | DRSC22431 | CG32263,<br>CG10854                                                                          |                | ENSP00000247712                                                             | Yes |
| Gr9a             | 1.25 | 3.12 | <b>2.19</b> | DRSC22506 | CG32693                                                                                      |                |                                                                             | Yes |
| dpr              | 2.42 | 1.94 | <b>2.18</b> | DRSC06399 | CG13439                                                                                      |                |                                                                             | Yes |
| CG2218           | 1.86 | 2.50 | <b>2.18</b> | DRSC28089 | CG2218                                                                                       | <b>UBOX5</b>   |                                                                             | Yes |
| CG33276          | 1.58 | 2.77 | <b>2.18</b> | DRSC29463 | CG33276                                                                                      | <b>URM1</b>    | ENSP00000300461                                                             | Yes |
| kek5             | 1.48 | 2.88 | <b>2.18</b> | DRSC39004 | CG12199                                                                                      | <b>LRRC24</b>  |                                                                             | Yes |
| Empty Control    | 1.57 | 2.79 | <b>2.18</b> |           |                                                                                              |                |                                                                             |     |
| Rapgap1          | 2.34 | 2.00 | <b>2.17</b> | DRSC02293 | CG6682,                                                                                      | <b>RAP1GAP</b> | ENSP00000254695,                                                            | Yes |
| Psi              | 2.49 | 1.85 | <b>2.17</b> | DRSC07519 | CG8912                                                                                       | <b>KHSRP</b>   | ENSP00000201886,<br>ENSP00000294623,                                        |     |
| Xrp1             | 2.21 | 2.13 | <b>2.17</b> | DRSC15283 | CG17836                                                                                      |                |                                                                             |     |
| CG1924           | 2.84 | 1.50 | <b>2.17</b> | DRSC19823 | CG1924                                                                                       | <b>CLGN</b>    | ENSP00000247461,                                                            | Yes |
| HDC20561         | 2.24 | 2.09 | <b>2.17</b> | DRSC21176 |                                                                                              |                |                                                                             |     |
| CG18193          | 1.72 | 2.62 | <b>2.17</b> | DRSC25198 | CG18193                                                                                      |                |                                                                             |     |
| CG31404          | 1.64 | 2.70 | <b>2.17</b> | DRSC28438 | CG31404,                                                                                     |                |                                                                             |     |
| CG34172          | 2.14 | 2.20 | <b>2.17</b> | DRSC38937 | CG34172                                                                                      |                |                                                                             |     |
| CG30005          | 1.03 | 3.28 | <b>2.16</b> | DRSC06244 | CG30005,                                                                                     |                |                                                                             |     |
| CG13727          | 1.16 | 3.15 | <b>2.16</b> | DRSC10055 | CG13727                                                                                      |                |                                                                             |     |

|               |      |      |             |           |                                |                 |                                                          |     |
|---------------|------|------|-------------|-----------|--------------------------------|-----------------|----------------------------------------------------------|-----|
| CG12290       | 2.67 | 1.64 | <b>2.16</b> | DRSC14497 | CG12290                        |                 |                                                          |     |
| Ucp4A         | 2.49 | 1.82 | <b>2.16</b> | DRSC19996 | CG6492                         | <b>SLC25A27</b> | ENSP00000283295                                          | Yes |
| CG3803        | 2.12 | 2.17 | <b>2.15</b> | DRSC04420 | CG3803                         | <b>COX15</b>    | ENSP00000016171                                          | Yes |
| CG1271        | 2.88 | 1.41 | <b>2.15</b> | DRSC08290 | CG1271                         | <b>GK5</b>      | ENSP00000311422                                          | Yes |
| CG32207       | 1.95 | 2.34 | <b>2.15</b> | DRSC09616 | CG32207                        |                 |                                                          |     |
| CG33630       | 1.61 | 2.69 | <b>2.15</b> | DRSC14546 | CG33630,                       |                 |                                                          |     |
| CG42458       | 2.77 | 1.53 | <b>2.15</b> | DRSC23261 | CG42458,                       |                 |                                                          |     |
| CG14508       | 2.47 | 1.82 | <b>2.15</b> | DRSC28229 | CG14508                        |                 | ENSP00000317159                                          | Yes |
| CG30118       | 1.59 | 2.69 | <b>2.14</b> | DRSC06632 | CG30118,                       |                 |                                                          |     |
| LysX          | 2.44 | 1.84 | <b>2.14</b> | DRSC08678 | CG9120                         |                 | ENSP00000261267                                          |     |
| Nha2          | 2.25 | 2.02 | <b>2.14</b> | DRSC15623 | CG4682,                        |                 |                                                          |     |
| Irc           | 2.16 | 2.12 | <b>2.14</b> | DRSC28100 | CG8913                         |                 |                                                          | Yes |
| CG31694       | 2.17 | 2.08 | <b>2.13</b> | DRSC00566 | CG31694,<br>CG3098,<br>CG15401 | <b>IFRD1</b>    | ENSP00000347784                                          | Yes |
| CG8668        | 3.13 | 1.13 | <b>2.13</b> | DRSC24942 | CG8668                         | <b>B3GALT1</b>  | ENSP00000294647,<br>ENSP00000303740,<br>ENSP00000323479, | Yes |
| PEK           | 2.77 | 1.46 | <b>2.12</b> | DRSC12361 | CG2087                         | <b>EIF2AK3</b>  | ENSP00000307235                                          | Yes |
| CG8500        | 1.28 | 2.95 | <b>2.12</b> | DRSC27083 | CG8500                         | <b>DIRAS2</b>   | ENSP00000297682,                                         |     |
| CG11455       | 2.52 | 1.69 | <b>2.11</b> | DRSC00311 | CG11455                        |                 |                                                          |     |
| CG11249       | 2.66 | 1.56 | <b>2.11</b> | DRSC11645 | CG11249                        |                 |                                                          |     |
| nerfin-2      | 1.00 | 3.22 | <b>2.11</b> | DRSC28542 | CG12809                        |                 |                                                          |     |
| CG10384       | 2.97 | 1.24 | <b>2.11</b> | DRSC28924 | CG10384                        |                 |                                                          |     |
| Empty Control | 2.19 | 2.03 | <b>2.11</b> |           |                                |                 |                                                          |     |
| CG9663        | 2.30 | 1.90 | <b>2.10</b> | DRSC00724 | CG9663                         |                 |                                                          |     |
| CG31742       | 2.05 | 2.15 | <b>2.10</b> | DRSC01617 | CG31742                        |                 |                                                          |     |
| I(2)03659     | 2.18 | 2.01 | <b>2.10</b> | DRSC07638 | CG11803,<br>CG8799             | <b>ABCC4</b>    | ENSP00000261295                                          | Yes |
| CG32198       | 2.16 | 2.03 | <b>2.10</b> | DRSC09553 | CG32198                        |                 |                                                          |     |
| CG4757        | 2.36 | 1.84 | <b>2.10</b> | DRSC14130 | CG4757                         |                 |                                                          |     |
| CG14401       | 2.36 | 1.83 | <b>2.10</b> | DRSC24098 | CG14401                        |                 |                                                          |     |
| CG32702       | 2.05 | 2.15 | <b>2.10</b> | DRSC29380 | CG32702,<br>CG2996             | <b>CUBN</b>     | ENSP00000265929                                          | Yes |
| I(2)44DEa     | 1.44 | 2.74 | <b>2.09</b> | DRSC07252 | CG8732                         | <b>ACSL3</b>    | ENSP00000339787,<br>ENSP00000350012                      | Yes |
| Lrrk          | 1.74 | 2.44 | <b>2.09</b> | DRSC15816 | CG5483                         |                 | ENSP00000298910                                          | Yes |
| Ras85D        | 1.81 | 2.37 | <b>2.09</b> | DRSC16814 | CG9375                         | <b>KRAS</b>     | ENSP00000256078,                                         | Yes |
| CG34294       | 1.44 | 2.73 | <b>2.09</b> | DRSC38649 | CG34294                        |                 |                                                          |     |

|                 |      |      |             |           |                                                                                                         |               |                                                         |     |
|-----------------|------|------|-------------|-----------|---------------------------------------------------------------------------------------------------------|---------------|---------------------------------------------------------|-----|
| lola            | 2.65 | 1.51 | <b>2.08</b> | DRSC05222 | CG30013,<br>CG12052,<br>CG18379,<br>CG30014,<br>CG18380,<br>CG18378,<br>CG18376,<br>CG18381,<br>CG22142 |               | ENSP00000331926,<br>ENSP00000339023,<br>ENSP00000351539 | Yes |
| l(2)05510       | 2.42 | 1.74 | <b>2.08</b> | DRSC05896 | CG13432,<br>CG13433                                                                                     |               |                                                         |     |
| CG9855          | 2.40 | 1.75 | <b>2.08</b> | DRSC12344 | CG9855                                                                                                  | <b>5-Mar</b>  | ENSP00000351813                                         |     |
| CG42508, CG4468 | 2.49 | 1.66 | <b>2.08</b> | DRSC15586 | CG42508:                                                                                                |               |                                                         |     |
| Or94b           | 2.17 | 1.99 | <b>2.08</b> | DRSC16773 | CG6679                                                                                                  |               |                                                         | Yes |
| CG2865          | 2.97 | 1.19 | <b>2.08</b> | DRSC18527 | CG2865                                                                                                  |               |                                                         |     |
| ptr             | 1.67 | 2.49 | <b>2.08</b> | DRSC22106 | CG2841                                                                                                  |               |                                                         | Yes |
| CG15695         | 1.83 | 2.32 | <b>2.08</b> | DRSC29582 | CG15695                                                                                                 |               |                                                         |     |
| CG3499          | 1.20 | 2.93 | <b>2.07</b> | DRSC04378 | CG3499                                                                                                  | <b>YME1L1</b> | ENSP00000318480                                         | Yes |
| iPLA2-VIA       | 2.10 | 2.03 | <b>2.07</b> | DRSC10699 | CG6718                                                                                                  | <b>PLA2G6</b> | ENSP00000333142                                         | Yes |
| Pnn             | 1.83 | 2.31 | <b>2.07</b> | DRSC16415 | CG8383                                                                                                  | <b>PNN</b>    | ENSP00000216832                                         |     |
| CG9793          | 2.48 | 1.65 | <b>2.07</b> | DRSC16564 | CG9793                                                                                                  |               |                                                         |     |
| CecA2           | 1.75 | 2.39 | <b>2.07</b> | DRSC16604 | CG1367                                                                                                  |               |                                                         | Yes |
| HDC10807        | 1.97 | 2.17 | <b>2.07</b> | DRSC21683 |                                                                                                         |               |                                                         |     |
| CG31054         | 2.84 | 1.30 | <b>2.07</b> | DRSC22134 | CG31054                                                                                                 |               |                                                         |     |
| CG4752          | 3.11 | 1.03 | <b>2.07</b> | DRSC27141 | CG4752                                                                                                  | <b>OPLAH</b>  | ENSP00000353877                                         |     |
| Tsp42Ej         | 1.46 | 2.65 | <b>2.06</b> | DRSC06113 | CG12143                                                                                                 |               |                                                         | Yes |
| Corin           | 2.96 | 1.15 | <b>2.06</b> | DRSC06818 | CG2105                                                                                                  |               | ENSP00000273857                                         | Yes |
| Ank2            | 2.60 | 1.51 | <b>2.06</b> | DRSC08894 | CG34416,                                                                                                | <b>ANK2</b>   | ENSP00000280772,                                        | Yes |
| Pif1A           | 1.50 | 2.62 | <b>2.06</b> | DRSC14383 | CG9808,                                                                                                 |               |                                                         |     |
| SF2             | 1.94 | 2.17 | <b>2.06</b> | DRSC16845 | CG6987                                                                                                  | <b>SFRS1</b>  | ENSP00000258962                                         |     |
| Cda5            | 2.09 | 2.00 | <b>2.05</b> | DRSC00532 | CG2761,<br>CG2776,                                                                                      |               |                                                         |     |
| CG5539          | 1.90 | 2.19 | <b>2.05</b> | DRSC04510 | CG5539                                                                                                  |               |                                                         |     |
| sprt            | 1.76 | 2.33 | <b>2.05</b> | DRSC07323 | CG9026,                                                                                                 |               |                                                         |     |
| CG5819          | 1.69 | 2.41 | <b>2.05</b> | DRSC28265 | CG5819                                                                                                  |               |                                                         |     |

|                  |      |      |             |           |                                                                                             |                                                |                                                            |     |
|------------------|------|------|-------------|-----------|---------------------------------------------------------------------------------------------|------------------------------------------------|------------------------------------------------------------|-----|
| HDC01093         | 1.33 | 2.77 | <b>2.05</b> | DRSC29110 |                                                                                             |                                                |                                                            |     |
| Scgalpha         | 1.36 | 2.74 | <b>2.05</b> | DRSC29625 | CG7851                                                                                      |                                                | ENSP00000262018,                                           | Yes |
| Shal             | 1.57 | 2.51 | <b>2.04</b> | DRSC11283 | CG9262                                                                                      | <b>KCND2</b>                                   | ENSP00000218176,<br>ENSP00000319591,                       | Yes |
| Cyp6v1           | 1.20 | 2.87 | <b>2.04</b> | DRSC20565 | CG1829                                                                                      |                                                |                                                            |     |
| btz              | 2.08 | 1.99 | <b>2.04</b> | DRSC23613 | CG12878                                                                                     | <b>CASC3</b>                                   | ENSP00000264645                                            |     |
| B52              | 2.26 | 1.82 | <b>2.04</b> | DRSC25482 | CG10851                                                                                     | <b>SFRS6</b>                                   | ENSP00000234982,<br>ENSP00000244020                        |     |
| lr56c            | 2.15 | 1.92 | <b>2.04</b> | DRSC26227 | CG15122                                                                                     |                                                |                                                            | Yes |
| CG18605          | 1.94 | 2.14 | <b>2.04</b> | DRSC26583 | CG18605                                                                                     |                                                |                                                            |     |
| CG13126          | 2.63 | 1.45 | <b>2.04</b> | DRSC27620 | CG13126                                                                                     | <b>METT11D1</b>                                | ENSP00000343041                                            |     |
| tutl             | 1.20 | 2.85 | <b>2.03</b> | DRSC00443 | CG15427,                                                                                    |                                                | ENSP00000198587                                            |     |
| CG31897          | 1.14 | 2.92 | <b>2.03</b> | DRSC01020 | CG31897                                                                                     |                                                |                                                            |     |
| CG15263          | 2.15 | 1.90 | <b>2.03</b> | DRSC01974 | CG15263                                                                                     |                                                |                                                            |     |
| CG5694           | 1.60 | 2.46 | <b>2.03</b> | DRSC02879 | CG5694                                                                                      |                                                |                                                            |     |
| CG12344          | 2.51 | 1.54 | <b>2.03</b> | DRSC06136 | CG12344                                                                                     |                                                |                                                            |     |
| gk               | 1.58 | 2.48 | <b>2.03</b> | DRSC10045 | CG13696,                                                                                    |                                                |                                                            |     |
| CG42269          | 2.27 | 1.78 | <b>2.03</b> | DRSC10670 | CG42269,                                                                                    |                                                |                                                            |     |
| CG14375          | 1.82 | 2.24 | <b>2.03</b> | DRSC14835 | CG14375                                                                                     |                                                |                                                            |     |
| CG32581, CG8974  | 2.17 | 1.88 | <b>2.03</b> | DRSC20136 | CG32581:<br>CG32581;<br>CG8974:<br>CG8974                                                   | <b>CG32581:<br/>RNF185; CG8974:<br/>RNF185</b> | CG32581:<br>ENSP00000320508,<br>CG8974:<br>ENSP00000320508 |     |
| sif              | 1.81 | 2.25 | <b>2.03</b> | DRSC22065 | CG5256,<br>CG5406,<br>CG32414,                                                              |                                                | ENSP00000286827                                            | Yes |
| CG13705          | 2.69 | 1.37 | <b>2.03</b> | DRSC22691 | CG13705                                                                                     |                                                |                                                            |     |
|                  | 2.85 | 1.21 | <b>2.03</b> | DRSC22765 |                                                                                             |                                                |                                                            |     |
| Bx               | 2.46 | 1.59 | <b>2.03</b> | DRSC23048 | CG6500                                                                                      | <b>LMO1</b>                                    | ENSP00000338207,                                           |     |
| fz3              | 1.82 | 2.23 | <b>2.03</b> | DRSC29682 | CG16785                                                                                     |                                                |                                                            | Yes |
| CG4594           | 2.55 | 1.48 | <b>2.02</b> | DRSC02762 | CG4594                                                                                      | <b>DCI</b>                                     | ENSP00000301729                                            | Yes |
| CG13445          | 1.59 | 2.44 | <b>2.02</b> | DRSC09992 | CG13445                                                                                     |                                                |                                                            |     |
| CG8607           | 1.65 | 2.38 | <b>2.02</b> | DRSC11012 | CG8607                                                                                      |                                                |                                                            |     |
| CG33722, CG18749 | 1.97 | 2.07 | <b>2.02</b> | DRSC15386 | CG33722:<br>CG33722,<br>CG31188,<br>CG18238;<br>CG18749:<br>CG18749,<br>CG18238,<br>CG33722 |                                                | CG33722:<br>ENSP00000306625                                |     |
| Trc8             | 2.17 | 1.87 | <b>2.02</b> | DRSC15437 | CG2304                                                                                      | <b>RNF139</b>                                  | ENSP00000304051                                            |     |



|                                               |      |      |             |           |                                           |                     |                                     |     |
|-----------------------------------------------|------|------|-------------|-----------|-------------------------------------------|---------------------|-------------------------------------|-----|
| Cyp1                                          | 2.41 | 1.63 | <b>2.02</b> | DRSC20234 | CG9916                                    | <b>PPIF</b>         | ENSP00000225174                     |     |
| HDC20548                                      | 2.80 | 1.24 | <b>2.02</b> | DRSC21162 |                                           |                     |                                     |     |
| HDC18916                                      | 2.19 | 1.85 | <b>2.02</b> | DRSC21407 |                                           |                     |                                     |     |
| HDC08957 ('+' in                              | 2.74 | 1.29 | <b>2.02</b> | DRSC25844 |                                           |                     |                                     |     |
| pdm3                                          | 2.59 | 1.45 | <b>2.02</b> | DRSC29989 | CG11641                                   |                     | ENSP00000330190,                    | Yes |
| CG41561                                       | 1.25 | 2.79 | <b>2.02</b> | DRSC38629 | CG41561                                   |                     |                                     |     |
| HDC02230,                                     | 2.14 | 1.88 | <b>2.01</b> | DRSC00072 |                                           |                     |                                     |     |
| CG31827, CG18478                              | 1.89 | 2.13 | <b>2.01</b> | DRSC01958 | CG31827:                                  |                     |                                     |     |
| CG14490                                       | 1.57 | 2.45 | <b>2.01</b> | DRSC06461 | CG14490                                   | <b>MORN3</b>        | ENSP00000347486                     |     |
| Or65a                                         | 1.96 | 2.05 | <b>2.01</b> | DRSC08808 | CG32401                                   |                     |                                     | Yes |
| CG11501                                       | 2.62 | 1.39 | <b>2.01</b> | DRSC14317 | CG11501                                   |                     |                                     |     |
| alpha-Man-IIb                                 | 1.48 | 2.53 | <b>2.01</b> | DRSC16898 | CG4606                                    |                     |                                     |     |
| CG7299                                        | 1.28 | 2.74 | <b>2.01</b> | DRSC25553 | CG7299                                    |                     |                                     |     |
| CG34308                                       | 2.16 | 1.86 | <b>2.01</b> | DRSC38663 | CG34308                                   |                     |                                     |     |
| logs                                          | 2.58 | 1.42 | <b>2.00</b> | DRSC02997 | CG6866                                    | <b>TARBP2</b>       | ENSP00000266987,                    |     |
| CG7720                                        | 2.43 | 1.57 | <b>2.00</b> | DRSC16306 | CG7720                                    |                     |                                     |     |
| CG11816                                       | 1.17 | 2.82 | <b>2.00</b> | DRSC19428 | CG11816                                   |                     |                                     |     |
| Lsd-2                                         | 1.54 | 2.46 | <b>2.00</b> | DRSC20143 | CG9057                                    |                     | ENSP00000221957,                    |     |
| CG14650                                       | 2.03 | 1.96 | <b>2.00</b> | DRSC23822 | CG14650                                   |                     |                                     |     |
| iav                                           | 1.15 | 2.84 | <b>2.00</b> | DRSC25119 | CG4536                                    |                     | ENSP00000265310,<br>ENSP00000310825 | Yes |
| W                                             | 1.17 | 2.83 | <b>2.00</b> | DRSC25461 | CG5123                                    |                     |                                     |     |
| CG9682                                        | 2.92 | 1.08 | <b>2.00</b> | DRSC25635 | CG9682                                    |                     |                                     |     |
| CG9723                                        | 1.52 | 2.47 | <b>2.00</b> | DRSC26963 | CG9723                                    |                     | ENSP00000300128                     |     |
| HDC06432 ('+' in<br>Stolc et al) ('+' in Hild | 1.32 | 2.67 | <b>2.00</b> | DRSC28109 |                                           |                     |                                     |     |
| dom                                           |      |      | <b>2.00</b> | DRSC29669 | CG9696                                    |                     | ENSP00000330620                     | Yes |
| CG18591                                       | 2.64 | 1.34 | <b>1.99</b> | DRSC02680 | CG18591                                   | <b>LOC100130109</b> | ENSP00000327930,<br>ENSP00000329276 |     |
| PGRP-LA                                       | 1.31 | 2.67 | <b>1.99</b> | DRSC10414 | CG4384,<br>CG4361,<br>CG18614,<br>CG32042 |                     |                                     | Yes |
| Mbs                                           | 1.71 | 2.27 | <b>1.99</b> | DRSC10553 | CG32156,<br>CG5891,<br>CG5600             | <b>PPP1R12A</b>     | ENSP00000261207,<br>ENSP00000337897 |     |
| CG32436                                       | 2.48 | 1.50 | <b>1.99</b> | DRSC11683 | CG32436,                                  |                     |                                     |     |
| HDC12032                                      | 1.85 | 2.13 | <b>1.99</b> | DRSC12098 |                                           |                     |                                     |     |

|                                               |      |      |             |           |                                 |                    |                                                         |     |
|-----------------------------------------------|------|------|-------------|-----------|---------------------------------|--------------------|---------------------------------------------------------|-----|
| CG8138                                        | 1.79 | 2.19 | <b>1.99</b> | DRSC16386 | CG8138                          |                    | ENSP00000350818                                         |     |
| CG31523                                       | 2.22 | 1.75 | <b>1.99</b> | DRSC27253 | CG31523,<br>CG9798              |                    | ENSP00000163344                                         |     |
| CG1368                                        | 2.00 | 1.97 | <b>1.99</b> | DRSC38997 | CG1368                          |                    |                                                         |     |
| HDC04226                                      | 1.42 | 2.54 | <b>1.98</b> | DRSC03972 |                                 |                    |                                                         |     |
| CG9018                                        | 1.99 | 1.96 | <b>1.98</b> | DRSC08618 | CG9018                          | <b>RPRD1B</b>      | ENSP00000217394,                                        |     |
| shep                                          | 1.58 | 2.37 | <b>1.98</b> | DRSC09771 | CG10647,<br>CG32423,<br>CG10649 | <b>RBMS3</b>       | ENSP00000262031,<br>ENSP00000273139,<br>ENSP00000294904 |     |
| GI                                            | 2.25 | 1.70 | <b>1.98</b> | DRSC11175 | CG9206                          | <b>DCTN1</b>       | ENSP00000354791                                         |     |
| CG12499                                       | 1.42 | 2.53 | <b>1.98</b> | DRSC14521 | CG12499                         |                    |                                                         |     |
| HDC20560                                      | 2.40 | 1.55 | <b>1.98</b> | DRSC21175 |                                 |                    |                                                         |     |
| CG42336                                       | 2.25 | 1.70 | <b>1.98</b> | DRSC29534 | CG42336,                        |                    |                                                         |     |
| Empty Control                                 | 2.33 | 1.62 | <b>1.98</b> |           |                                 |                    |                                                         |     |
| CG9389                                        | 1.65 | 2.28 | <b>1.97</b> | DRSC11857 | CG9389                          | <b>IMPA2</b>       |                                                         |     |
| l(3)mbt                                       | 2.67 | 1.26 | <b>1.97</b> | DRSC16983 | CG5954                          | <b>L3MBTL3</b>     | ENSP00000318543,<br>ENSP00000329844,<br>ENSP00000354526 |     |
| Pp2B-14D                                      | 2.18 | 1.76 | <b>1.97</b> | DRSC20270 | CG9842                          | <b>PPP3CA</b>      | ENSP00000240139,                                        | Yes |
| stai                                          | 1.94 | 2.00 | <b>1.97</b> | DRSC28369 | CG5981,                         |                    | ENSP00000220876,                                        |     |
| CG8038                                        | 1.3  | 2.63 | <b>1.97</b> | DRSC29825 | CG8038                          | <b>POP4</b>        | ENSP00000221770                                         |     |
| CG12082                                       | 2.46 | 1.45 | <b>1.96</b> | DRSC08244 | CG12082                         | <b>USP5</b>        | ENSP00000229268,                                        |     |
| Ard1, CG42455                                 | 2.03 | 1.88 | <b>1.96</b> | DRSC09867 | Ard1:<br>CG11989;<br>CG42455;   | <b>Ard1: ARD1A</b> | Ard1:<br>ENSP00000218149,<br>Ard1:                      |     |
| Hpr1                                          | 2.31 | 1.60 | <b>1.96</b> | DRSC12296 | CG2031                          | <b>THOC1</b>       | ENSP00000261600                                         |     |
| CG10311                                       | 2.21 | 1.71 | <b>1.96</b> | DRSC14228 | CG10311                         |                    |                                                         |     |
| CHKov1                                        | 2.11 | 1.81 | <b>1.96</b> | DRSC14258 | CG10618                         |                    |                                                         |     |
| aop                                           | 2.39 | 1.52 | <b>1.96</b> | DRSC25805 | CG3166                          |                    | ENSP00000266427,<br>ENSP00000341843                     | Yes |
| mas                                           | 2.47 | 1.45 | <b>1.96</b> | DRSC28905 | CG15002                         |                    |                                                         |     |
| HDC18999 ('+' in<br>Stolc et al) ('+' in Hild | 1.51 | 2.41 | <b>1.96</b> | DRSC29372 |                                 |                    |                                                         |     |
| CG4259                                        | 2.76 | 1.16 | <b>1.96</b> | DRSC29614 | CG4259                          |                    |                                                         |     |
| CG6409                                        | 1.22 | 2.68 | <b>1.95</b> | DRSC10630 | CG6409                          |                    |                                                         |     |
| LysP                                          | 1.09 | 2.80 | <b>1.95</b> | DRSC25210 | CG9116                          |                    | ENSP00000261267                                         |     |
| Syn1                                          | 1.5  | 2.39 | <b>1.95</b> | DRSC30039 | CG7152,                         | <b>SNTB1</b>       | ENSP00000217381,                                        |     |
| ia2                                           | 1.95 | 1.92 | <b>1.94</b> | DRSC00304 | CG11344,                        |                    | ENSP00000295718,                                        | Yes |

|                                                         |      |      |             |           |                                                                                           |                            |                                                                                                                                         |     |
|---------------------------------------------------------|------|------|-------------|-----------|-------------------------------------------------------------------------------------------|----------------------------|-----------------------------------------------------------------------------------------------------------------------------------------|-----|
| lectin-24A                                              | 2.21 | 1.67 | <b>1.94</b> | DRSC00604 | CG3410                                                                                    |                            | ENSP00000254850,<br>ENSP00000264072,<br>ENSP00000269299,<br>ENSP00000315477,<br>ENSP00000316228,<br>ENSP00000327599,<br>ENSP00000352860 |     |
| CG15485                                                 | 2.18 | 1.69 | <b>1.94</b> | DRSC02495 | CG15485                                                                                   |                            |                                                                                                                                         |     |
| Tim17b2                                                 | 1.99 | 1.88 | <b>1.94</b> | DRSC03457 | CG15257                                                                                   | <b>TIMM17A</b>             | ENSP00000263235,                                                                                                                        | Yes |
| Acox57D-d                                               | 2.19 | 1.69 | <b>1.94</b> | DRSC04561 | CG9709                                                                                    |                            | ENSP00000293217                                                                                                                         | Yes |
| tatl, moi                                               | 2.11 | 1.77 | <b>1.94</b> | DRSC16371 | tatl: CG8045,<br>CG31241;<br>moi: CG42350                                                 |                            | tatl:<br>ENSP00000260129                                                                                                                |     |
| hfw                                                     | 1.90 | 1.97 | <b>1.94</b> | DRSC18506 | CG3095                                                                                    |                            | ENSP00000291592,<br>ENSP00000326763                                                                                                     |     |
| CG1529                                                  | 1.75 | 2.12 | <b>1.94</b> | DRSC20515 | CG1529                                                                                    |                            |                                                                                                                                         |     |
|                                                         | 1.46 | 2.41 | <b>1.94</b> | DRSC21129 |                                                                                           |                            |                                                                                                                                         |     |
| CG14210, CG12788,                                       | 2.02 | 1.85 | <b>1.94</b> | DRSC29021 | CG14210:                                                                                  | <b>CG14210:</b>            | CG12788:                                                                                                                                |     |
| CG4291                                                  | 2.06 | 1.80 | <b>1.93</b> | DRSC00650 | CG4291                                                                                    | <b>WBP4</b>                | ENSP00000239880                                                                                                                         |     |
| dyn-p25                                                 | 1.22 | 2.64 | <b>1.93</b> | DRSC03525 | CG10846                                                                                   | <b>DCTN5</b>               | ENSP00000300087                                                                                                                         |     |
| Eps-15                                                  | 1.84 | 2.01 | <b>1.93</b> | DRSC04288 | CG16932                                                                                   | <b>EPS15L1</b>             | ENSP00000248070,                                                                                                                        |     |
| CG14974                                                 | 2.05 | 1.81 | <b>1.93</b> | DRSC08433 | CG14974                                                                                   |                            |                                                                                                                                         |     |
| CG8757                                                  | 1.91 | 1.94 | <b>1.93</b> | DRSC24587 | CG8757                                                                                    |                            | ENSP00000354182                                                                                                                         |     |
| CG15080                                                 | 1.65 | 2.20 | <b>1.93</b> | DRSC29374 | CG15080                                                                                   |                            |                                                                                                                                         |     |
| unc-5                                                   | 1.58 | 2.26 | <b>1.92</b> | DRSC05545 | CG8166,<br>CG8168                                                                         | <b>UNC5C</b>               | ENSP00000261961,<br>ENSP00000287272,<br>ENSP00000328673,<br>ENSP00000349775                                                             |     |
| CG14210, CG12788,<br>Tim9b                              | 1.74 | 2.09 | <b>1.92</b> | DRSC19566 | CG14210:<br>CG14210;<br>CG12788:<br>CG12788,<br>CG33066;<br>Tim9b:<br>CG33066,<br>CG12788 | <b>CG14210:<br/>CCDC86</b> | CG12788:<br>ENSP00000313077,<br>CG14210:<br>ENSP00000227520,<br>CG14210:<br>ENSP00000343680,<br>Tim9b:<br>ENSP00000254616               |     |
| jdp                                                     | 1.71 | 2.12 | <b>1.92</b> | DRSC29394 | CG2239                                                                                    | <b>DNAJC12</b>             | ENSP00000225171                                                                                                                         | Yes |
| HDC09397 ('+' in<br>Stolc et al) ('+' in Hild<br>et al) | 2.74 | 1.09 | <b>1.92</b> | DRSC29527 |                                                                                           |                            |                                                                                                                                         |     |
| CG31813                                                 | 1.49 | 2.34 | <b>1.92</b> | DRSC29629 | CG31813                                                                                   |                            |                                                                                                                                         |     |

|               |      |      |      |           |                                                        |             |                                                         |  |
|---------------|------|------|------|-----------|--------------------------------------------------------|-------------|---------------------------------------------------------|--|
| CG17712       | 2.10 | 1.71 | 1.91 | DRSC00266 | CG17712                                                | GFOD1       | ENSP00000268797,<br>ENSP00000274688                     |  |
| HDC02513      | 1.94 | 1.88 | 1.91 | DRSC02484 |                                                        |             |                                                         |  |
| eEF1delta     | 2.00 | 1.82 | 1.91 | DRSC02790 | CG4912                                                 | EEF1D       | ENSP00000339046,<br>ENSP00000343513,                    |  |
| sm            | 1.21 | 2.61 | 1.91 | DRSC05795 | CG9218                                                 | HNRNPL      | ENSP00000221419,                                        |  |
| CG32100       | 2.40 | 1.42 | 1.91 | DRSC10331 | CG32100,<br>CG10429,<br>CG18638                        |             |                                                         |  |
| futsch        | 1.34 | 2.48 | 1.91 | DRSC17949 | CG34387,                                               | MAP1B       | ENSP00000296755,                                        |  |
| m             | 2.39 | 1.42 | 1.91 | DRSC29636 | CG9369                                                 |             |                                                         |  |
| Cyt-c-d       | 2.65 | 1.17 | 1.91 | DRSC30051 | CG13263                                                |             |                                                         |  |
| CG7945        | 1.80 | 2.00 | 1.90 | DRSC10934 | CG7945,<br>CG17014                                     | BAG2        | ENSP00000265033                                         |  |
| Mec2          | 2.12 | 1.67 | 1.90 | DRSC26162 | CG7635                                                 |             |                                                         |  |
| CG32147       | 2.77 | 1.01 | 1.89 | DRSC09346 | CG32147                                                | PGPEP1      | ENSP00000252813                                         |  |
| CG3257        | 1.82 | 1.96 | 1.89 | DRSC27446 | CG3257                                                 |             |                                                         |  |
| Srp68         | 2.28 | 1.50 | 1.89 | DRSC28655 | CG5064                                                 | SRP68       | ENSP00000312066                                         |  |
| CG1468        | 2.14 | 1.61 | 1.88 | DRSC17946 | CG1468                                                 |             |                                                         |  |
| Act79B        | 1.77 | 1.96 | 1.87 | DRSC11604 | CG7478                                                 | ACTA2       |                                                         |  |
| Nnf1b         | 1.72 | 2.02 | 1.87 | DRSC22080 | CG31658                                                |             |                                                         |  |
| CG6870        | 1.50 | 2.23 | 1.87 | DRSC25586 | CG6870                                                 |             |                                                         |  |
| TBPH          | 1.80 | 1.93 | 1.87 | DRSC28032 | CG10327                                                | TARDBP      | ENSP00000240185,<br>ENSP00000313129,<br>ENSP00000323324 |  |
| CG15436       | 2.12 | 1.61 | 1.87 | DRSC29550 | CG15436                                                |             |                                                         |  |
| slmo, CG34179 | 2.00 | 1.71 | 1.86 | DRSC03143 | slmo: CG9131;                                          | slmo: SLMO2 | slmo:                                                   |  |
| ems           | 1.95 | 1.77 | 1.86 | DRSC25044 | CG2988                                                 | EMX2        | ENSP00000258106,                                        |  |
| CG8157        | 1.17 | 2.55 | 1.86 | DRSC25401 | CG8157                                                 |             |                                                         |  |
| MtnB          | 1.52 | 2.20 | 1.86 | DRSC29147 | CG4312                                                 |             |                                                         |  |
| CG42389       | 1.36 | 2.33 | 1.85 | DRSC02769 | CG42389,<br>CG13260,<br>CG13261,<br>CG4668,<br>CG31738 |             | ENSP00000338523,<br>ENSP00000338579                     |  |
| CG7461        | 1.54 | 2.13 | 1.84 | DRSC07022 | CG7461                                                 | ACADVL      | ENSP00000349297                                         |  |
| CG32590       | 1.72 | 1.93 | 1.83 | DRSC19594 | CG32590                                                |             |                                                         |  |
| CG30369       | 1.76 | 1.90 | 1.83 | DRSC29843 | CG30369                                                |             |                                                         |  |
| Dhc64C        | 1.16 | 2.46 | 1.81 | DRSC08656 | CG7507                                                 | DYNC1H1     | ENSP00000351750                                         |  |
| CG7102        | 2.44 | 1.16 | 1.80 | DRSC02647 | CG7102,<br>CG17973                                     | BTBD19      |                                                         |  |
| CG8813        | 1.78 | 1.80 | 1.79 | DRSC00706 | CG8813                                                 |             |                                                         |  |
| CG8552        | 2.51 | 1.06 | 1.79 | DRSC03095 | CG8552,<br>CG14278                                     | SEC23IP     | ENSP00000315208,<br>ENSP00000325142                     |  |

|                                                         |      |      |             |           |                                 |                |                                                                             |     |
|---------------------------------------------------------|------|------|-------------|-----------|---------------------------------|----------------|-----------------------------------------------------------------------------|-----|
| CG5174                                                  | 1.92 | 1.65 | <b>1.79</b> | DRSC06920 | CG5174                          | <b>TPD52L2</b> | ENSP00000217121,<br>ENSP00000263850,<br>ENSP00000341677,<br>ENSP00000351493 |     |
| CG15564                                                 | 2.13 | 1.38 | <b>1.76</b> | DRSC15102 | CG15564                         |                |                                                                             |     |
| CG1667                                                  | 2.02 | 1.47 | <b>1.75</b> | DRSC29477 | CG1667                          |                |                                                                             |     |
| drongo                                                  | 1.95 | 1.51 | <b>1.73</b> | DRSC00814 | CG3365                          | <b>AGFG1</b>   | ENSP00000300176,<br>ENSP00000312059                                         |     |
| Updo                                                    | 1.82 | 1.61 | <b>1.72</b> | DRSC30007 | CG1818                          | <b>UROD</b>    | ENSP00000246337                                                             | Yes |
| HDC07044 ('+' in<br>Stolc et al) ('+' in Hild<br>et al) | 1.17 | 2.25 | <b>1.71</b> | DRSC30040 |                                 |                |                                                                             |     |
| CG3709                                                  | 1.49 | 1.90 | <b>1.70</b> | DRSC00629 | CG3709                          | <b>PUS10</b>   | ENSP00000326003                                                             |     |
| CG8155                                                  | 1.98 | 1.41 | <b>1.70</b> | DRSC28386 | CG8155                          | <b>TBC1D25</b> | ENSP00000156097                                                             |     |
| Rpd3                                                    | 1.67 | 1.69 | <b>1.68</b> | DRSC08696 | CG7471                          | <b>HDAC1</b>   | ENSP00000271095,                                                            | Yes |
| Empty Control                                           | 1.74 | 1.62 | <b>1.68</b> |           |                                 |                |                                                                             |     |
| CG8032                                                  | 1.61 | 1.7  | <b>1.66</b> | DRSC29586 | CG8032                          | <b>SMOX</b>    | ENSP00000278060,<br>ENSP00000307252                                         |     |
| CG4375                                                  | 1.12 | 2.17 | <b>1.65</b> | DRSC25177 | CG4375                          |                |                                                                             |     |
| CG6834                                                  | 1.64 | 1.62 | <b>1.63</b> | DRSC29321 | CG6834                          |                |                                                                             |     |
| CG7288                                                  | 1.56 | 1.70 | <b>1.63</b> | DRSC29836 | CG7288                          | <b>USP39</b>   | ENSP00000312981                                                             |     |
| CG14128                                                 | 1.96 | 1.24 | <b>1.60</b> | DRSC10132 | CG14128                         |                |                                                                             |     |
| CG31048                                                 | 1.42 | 1.74 | <b>1.58</b> | DRSC14373 | CG31048,<br>CG11754,<br>CG14530 | <b>DOCK3</b>   | ENSP00000266037,<br>ENSP00000343906                                         |     |
| CG31755                                                 | 1.43 | 1.70 | <b>1.57</b> | DRSC02901 | CG31755,<br>CG5831              |                | ENSP00000310073                                                             |     |
| CG10000                                                 | 1.56 | 1.52 | <b>1.54</b> | DRSC29791 | CG10000                         |                |                                                                             |     |
| CG3520                                                  | 1.90 | 1.12 | <b>1.51</b> | DRSC04383 | CG3520                          |                |                                                                             |     |
| CG14529                                                 | 1.14 | 1.86 | <b>1.50</b> | DRSC14880 | CG14529                         |                |                                                                             |     |

---

**Primary screen results:****Known regulators of IMD/Dipt pathway identified in the primary screen**

---

## Negative Regulators

| <b>Gene</b>    | <b>Amplicon</b> | <b>Z-score (CO<sub>2</sub> only)</b> |
|----------------|-----------------|--------------------------------------|
| <i>cycD</i>    | DRSC25031       | 3.65                                 |
| <i>ena</i>     | DRSC25393       | 3.26                                 |
| <i>falafel</i> | DRSC16474       | 3.09                                 |
|                | DRSC23048,      | 2.94                                 |
| <i>bx</i>      | DRSC28506       | 2.03                                 |
| <i>kismet</i>  | DRSC00625       | 2.19                                 |
| <i>kek5</i>    | DRSC39004       | 2.18                                 |
| <i>Ras85D</i>  | DRSC16814       | 2.09                                 |

## Positive regulators

| <b>Gene</b>    | <b>Amplicon</b> | <b>Z-score (CO<sub>2</sub> only)</b> |
|----------------|-----------------|--------------------------------------|
| <i>relish</i>  | DRSC16819       | -3.45                                |
| <i>tak1</i>    | DRSC20562       | -2.40                                |
| <i>PGRP-LC</i> | DRSC28556       | -2.29                                |
| <i>RPL27A</i>  | DRSC28466       | -1.75                                |

## Secondary screen results: Top hits from secondary screening (in CO<sub>2</sub>)

| Gene             | Amplicon ID | Z-score |         |            |
|------------------|-------------|---------|---------|------------|
|                  |             | Expt. 1 | Expt. 2 | Avg.       |
| Rpd3             | DRSC08696   | 2.3     | 2.3     | <b>2.3</b> |
| xmas-2           | DRSC22178   | 1.3     | 2.1     | <b>1.7</b> |
| Irc              | DRSC28100   | 2.1     | 1.1     | <b>1.6</b> |
| mts              | DRSC36626   | 2.0     | 1.1     | <b>1.6</b> |
| Ubqn             | DRSC24055   | 1.4     | 1.4     | <b>1.4</b> |
| Acox57D-d        | DRSC04561   | 2.2     | 0.6     | <b>1.4</b> |
| drk              | DRSC27911   | 1.4     | 1.0     | <b>1.2</b> |
| fifl             | DRSC16474   | 0.9     | 1.4     | <b>1.1</b> |
| CG42330          | DRSC10765   | 1.3     | 0.7     | <b>1.0</b> |
| Scgalpha         | DRSC29625   | 0.8     | 1.2     | <b>1.0</b> |
| Cht2             | DRSC24801   | 0.5     | 1.4     | <b>1.0</b> |
| zfh2             | DRSC17178   | 1.3     | 0.5     | <b>0.9</b> |
| Bap              | DRSC23868   | 0.6     | 1.2     | <b>0.9</b> |
| trx              | DRSC17089   | 1.2     | 0.5     | <b>0.9</b> |
| CSN3             | DRSC11859   | 0.9     | 0.8     | <b>0.9</b> |
| scyl             | DRSC27699   | 1.3     | 0.4     | <b>0.8</b> |
| scaf6            | DRSC10676   | 0.6     | 1.1     | <b>0.8</b> |
| ena              | DRSC25393   | 0.5     | 1.1     | <b>0.8</b> |
| tna              | DRSC29530   | 1.6     | 0.0     | <b>0.8</b> |
| Sos              | DRSC23624   | 1.7     | -0.1    | <b>0.8</b> |
| CG33276          | DRSC29463   | 1.1     | 0.3     | <b>0.7</b> |
| Toll-7           | DRSC29640   | 0.2     | 1.2     | <b>0.7</b> |
| Aplip1           | DRSC08697   | 1.3     | 0.1     | <b>0.7</b> |
| Corin            | DRSC06818   | 0.2     | 1.1     | <b>0.7</b> |
| Sln              | DRSC07133   | 0.3     | 1.0     | <b>0.7</b> |
| SerT             | DRSC04655   | 0.5     | 0.7     | <b>0.6</b> |
| PEK              | DRSC12361   | -0.3    | 1.5     | <b>0.6</b> |
| sif              | DRSC22065   | 0.0     | 1.2     | <b>0.6</b> |
| sba              | DRSC17050   | 0.2     | 0.9     | <b>0.6</b> |
| CG1271           | DRSC08290   | 0.8     | 0.3     | <b>0.6</b> |
| ced-6            | DRSC07591   | 0.3     | 0.8     | <b>0.6</b> |
| kis              | DRSC00625   | 0.1     | 1.0     | <b>0.6</b> |
| wntD             | DRSC28538   | -0.4    | 1.5     | <b>0.6</b> |
| Ras85D           | DRSC16814   | -0.4    | 1.5     | <b>0.6</b> |
| RhoGAP15B        | DRSC19925   | 0.8     | 0.3     | <b>0.5</b> |
| gt               | DRSC28482   | 0.6     | 0.5     | <b>0.5</b> |
| CG2218           | DRSC28089   | 1.0     | 0.1     | <b>0.5</b> |
| CG31457          | DRSC29229   | 0.5     | 0.6     | <b>0.5</b> |
| CG3099           | DRSC18276   | 0.0     | 1.1     | <b>0.5</b> |
| Spargel          | DRSC12340   | 1.4     | -0.3    | <b>0.5</b> |
| tra2             | DRSC29704   | -0.1    | 1.0     | <b>0.5</b> |
| mfr              | DRSC10543   | 0.6     | 0.3     | <b>0.5</b> |
| CG30441, CG10395 | DRSC27079   | 1.4     | -0.5    | <b>0.5</b> |
| CG6361           | DRSC22231   | 0.4     | 0.6     | <b>0.5</b> |

|           |           |      |      |            |
|-----------|-----------|------|------|------------|
| Or94b     | DRSC16773 | 0.1  | 0.8  | <b>0.5</b> |
|           | DRSC14535 | -0.1 | 1.0  | <b>0.5</b> |
| zormin    | DRSC07969 | 1.0  | -0.1 | <b>0.4</b> |
| Rev1      | DRSC08264 | 0.5  | 0.4  | <b>0.4</b> |
| Pros28.1A | DRSC16800 | -0.3 | 1.2  | <b>0.4</b> |
| CG32702   | DRSC29380 | -0.2 | 1.0  | <b>0.4</b> |
| CG5522    | DRSC06941 | 0.3  | 0.4  | <b>0.4</b> |
| CG4594    | DRSC02762 | 0.9  | -0.2 | <b>0.4</b> |
| Scr       | DRSC29201 | 0.2  | 0.5  | <b>0.4</b> |
| CG5599    | DRSC25764 | -0.6 | 1.3  | <b>0.4</b> |
| CG8239    | DRSC20096 | 0.2  | 0.5  | <b>0.3</b> |
| Cpr73D    | DRSC26591 | 1.0  | -0.4 | <b>0.3</b> |
| Sur       | DRSC03447 | 0.2  | 0.3  | <b>0.3</b> |
| CG32263   | DRSC22431 | 0.0  | 0.5  | <b>0.3</b> |
| Gr9a      | DRSC22506 | -0.1 | 0.6  | <b>0.3</b> |
| CG13599   | DRSC14602 | -0.4 | 1.0  | <b>0.3</b> |
| GckIII    | DRSC15729 | 0.2  | 0.4  | <b>0.3</b> |
| CG10703   | DRSC29299 | 0.1  | 0.4  | <b>0.3</b> |
| CG7051    | DRSC27636 | 0.5  | 0.0  | <b>0.2</b> |
| NAT1      | DRSC30053 | 0.6  | -0.1 | <b>0.2</b> |
| Pvr       | DRSC36840 | -0.1 | 0.5  | <b>0.2</b> |
| CG15625   | DRSC39009 | -1.0 | 1.2  | <b>0.1</b> |
| CG8444    | DRSC16420 | -1.5 | 1.5  | <b>0.0</b> |



**Table SIII** Ratio of induction of *dipt-luc* in elevated CO<sub>2</sub> and in air for 39 candidate regulators

| Gene                        | Amplicon  | CO <sub>2</sub> /air @<br>[dsRNA] |      | Predicted functions                                                                                                                                             | Predicted human ortholog(s) |
|-----------------------------|-----------|-----------------------------------|------|-----------------------------------------------------------------------------------------------------------------------------------------------------------------|-----------------------------|
|                             |           | Low                               | High |                                                                                                                                                                 |                             |
| <i>zormin</i>               | DRSC07969 | 3.46                              | 7.14 | muscle/chromatin associated protein (Titin)                                                                                                                     | Titin                       |
| <i>zfh2</i>                 | DRSC17178 | 3.42                              | 4.69 | zinc finger homeodomain transcription factor                                                                                                                    | ZFHX3, ZFHX4                |
| <i>Fljl<sup>1</sup></i>     | DRSC16474 | 3.81                              | 3.08 | Serine/threonine-protein phosphatase 4 regulatory subunit 3, centromere protein binding, cell cycle regulation, asymmetric cell division, Rho GTPase regulation | SMEK2                       |
| <i>cg8239</i>               | DRSC20096 | 2.05                              | 4.69 | diphosphomevalonate decarboxylase activity - no clear function                                                                                                  | MVD                         |
| <i>mfr</i>                  | DRSC10543 | 3.55                              | 2.89 | synaptic vesicle exocytosis                                                                                                                                     | -                           |
| <i>ras85d<sup>*.1</sup></i> | DRSC16814 | 3.37                              | 2.73 | small GTPase RTK signaling, IMD regulation                                                                                                                      | KRas                        |
| <i>rhogap15b</i>            | DRSC19925 | 2.78                              | 2.90 | GAP for Rho family small GTPases                                                                                                                                | ARAP1, ARAP2, ARAP3         |
| <i>scaf6</i>                | DRSC10676 | 2.21                              | 3.35 | predicted mRNA binding                                                                                                                                          | CHERP                       |
| <i>corin</i>                | DRSC06818 | 1.62                              | 3.56 | scavenger receptor activity; serine-type endopeptidase activity                                                                                                 | SFRS1                       |
| <i>rpd3</i>                 | DRSC08696 | 2.30                              | 2.66 | Histone deacetylase superfamily                                                                                                                                 | HDAC1                       |
| <i>acox57D-d</i>            | DRSC04561 | 0.98                              | 3.91 | acyl-CoA dehydrogenase activity                                                                                                                                 | ACOX1/2                     |
| <i>trx</i>                  | DRSC17089 | 2.69                              | 2.09 | histone methyltransferase activity (H3-K4 specific)                                                                                                             | KMT2A/B                     |
| <i>ced-6</i>                | DRSC07591 | 1.34                              | 2.98 | PTB domain                                                                                                                                                      | GULP1                       |
| <i>cg1271</i>               | DRSC08290 | 2.06                              | 2.18 | Carbohydrate kinase                                                                                                                                             | GK5                         |
| <i>gckIII</i>               | DRSC15729 | 1.73                              | 2.35 | Serine/threonine/dual specificity protein kinase                                                                                                                | STK25                       |
| <i>kis<sup>*.2</sup></i>    | DRSC00625 | 2.14                              | 1.83 | ATP-dependent helicase activity, SNF2-related                                                                                                                   | CHD6/7                      |
| <i>serT</i>                 | DRSC04655 | 1.62                              | 2.18 | neurotransmitter:sodium symporter activity                                                                                                                      | SLC6A                       |
| <i>cg5522</i>               | DRSC06941 | 1.67                              | 1.93 | Ral guanyl-nucleotide exchange factor activity                                                                                                                  | RALGPS1/2                   |
| <i>cycd</i>                 | DRSC08264 | 1.02                              | 2.40 | cyclin-dependent protein serine/threonine kinase regulator activity                                                                                             | CCND2                       |
| <i>rev1</i>                 | DRSC08264 | 1.36                              | 1.88 | DNA-directed DNA polymerase activity                                                                                                                            | REV1                        |
| <i>sur</i>                  | DRSC03447 | 1.12                              | 1.80 | ABC transporter-like, sulfonyleurea receptor activity                                                                                                           | ABCC8/9                     |
| <i>drk</i>                  | DRSC27911 | 1.64                              | 1.10 | SH3/SH2 adaptor activity                                                                                                                                        | GRB2                        |
| <i>wntD</i>                 | DRSC28538 | 1.10                              | 1.58 | frizzled binding; G-protein coupled receptor binding                                                                                                            | WNT8/9                      |
| <i>mts</i>                  | DRSC36626 | 1.51                              | 1.11 | protein serine/threonine phosphatase activity                                                                                                                   | PPP4C/6C/2C                 |
| <i>cg31772</i>              | DRSC22869 | 0.93                              | 1.60 | PDZ domain; Pleckstrin homology domain                                                                                                                          | PPP1R9, ADAP1               |
| <i>ubqn</i>                 | DRSC24055 | 0.82                              | 1.53 | Ubiquitin-related domain                                                                                                                                        | UBQLN1-4                    |
| <i>cg30438</i>              | DRSC21419 | 1.02                              | 1.14 | UDP-glucuronosyl/UDP-glucosyltransferase                                                                                                                        | UGT8/1/2/4                  |

|                             |           |      |      |                                                             |                     |
|-----------------------------|-----------|------|------|-------------------------------------------------------------|---------------------|
| <i>gt</i>                   | DRSC28482 | 1.11 | 1.04 | sequence-specific DNA binding transcription factor activity | TEF, DBP, HLF       |
| <i>pvr</i> <sup>*,2,3</sup> | DRSC36840 | 0.84 | 1.30 | PDGF/VEGF-related receptor tyrosine kinase                  | PDGFR, VEGFR        |
| <i>scgalpha</i>             | DRSC29625 | 1.33 | 0.79 | Sarcoglycan $\alpha$ (Dystroglycan-type cadherin-like)      | Sarcoglycan epsilon |
| <i>tra2</i>                 | DRSC29704 | 1.35 | 0.62 | mRNA splicing factor                                        | TRA2                |
| <i>irc</i>                  | DRSC28100 | 0.57 | 1.33 | Immune-regulated catalase                                   | PTGS2               |
| <i>sos</i>                  | DRSC23624 | 1.15 | 0.75 | Ras/Rac guanyl-nucleotide exchange factor activity          | SOS1/2              |
| <i>tna</i>                  | DRSC29530 | 0.85 | 1.02 | Zinc finger, MIZ-type                                       | ZMIZ2/1             |
| <i>xmas-2</i>               | DRSC22178 | 1.11 | 0.71 | RRM (RNA recognition motif) domain                          | MCM3AP              |
| <i>ena</i>                  | DRSC25393 | 0.48 | 1.28 | Actin organization                                          | VASP                |
| <i>bap</i>                  | DRSC23868 | 0.92 | 0.74 | Transcription factor                                        | NKX3                |
| <i>slp2</i>                 | DRSC26622 | 0.92 | 0.68 | Transcription factor                                        | FOXG1               |
| <i>cht2</i>                 | DRSC24801 | 0.65 | 0.93 | Glycoside hydrolase                                         | CHIA, OVGPI, CHIT1  |

Genes are ordered approximately because the two screening conditions not directly comparable as the magnitude of the air/CO<sub>2</sub> ratio is variable between batches of cells

\* previously implicated in regulation of IMD signaling:

<sup>1</sup>Foley E, O'Farrell PH. Functional dissection of an innate immune response by a genome-wide RNAi screen. PLoS Biol. 2004 Aug;2(8):E203.

<sup>2</sup>Inhibitor of apoptosis 2 and TAK1-binding protein are components of the Drosophila Imd pathway. Kleino A<sup>1</sup>, Valanne S, Ulvila J, Kallio J, Myllymäki H, Enwald H, Stöven S, Poidevin M, Ueda R, Hultmark D, Lemaitre B, Rämet M. EMBO J. 2005 Oct 5;24(19):3423-34.

<sup>3</sup>Bond D, Foley E. A quantitative RNAi screen for JNK modifiers identifies Pvr as a novel regulator of Drosophila immune signaling. PLoS Pathog. 2009Nov;5(11)
